# Supplementary material
Source: HighWire-hosted journal article supplement (https://erj.ersjournals.com/content/54/4/1900609)
Supplement: inline-supplementary-material-1 [file inline-supplementary-material-1.pdf]

**Title: Differences in the demographics, management and outcome of women and men with Acute Respiratory Distress Syndrome in the LUNG SAFE prospective cohort study.**

**Authors:** \*B.A. McNicholas, \*F Madotto, T Pham, E Rezoagli, C.H. Masterson, S Horie, G Bellani, L. Brochard, J.G. Laffey. On behalf of the LUNG SAFE Investigators and the ESICM Trials Group.

**ONLINE DATA SUPPLEMENT**

**Table of Contents**

|                                                                                          |    |
|------------------------------------------------------------------------------------------|----|
| Expanded Methods                                                                         | 3  |
| Supplemental Tables                                                                      | 7  |
| Supplemental Figures                                                                     | 14 |
| References                                                                               | 17 |
| Appendix 1: National coordinators, Society/Network Endorsements<br>and Site Coordinators | 18 |

## **Expanded Methods and Materials**

### ***Study Design***

LUNG SAFE (ClinicalTrials.gov NCT02010073) was a prospective, observational, international multi-centre cohort study. Enrollment took place over four consecutive winter weeks (February-March in the northern hemisphere and June-August 2014 in the southern hemisphere), as selected by each participating site. The study, conceived by the Acute Respiratory Failure Section of the European Society of Intensive Care Medicine (ESICM), was endorsed by multiple national societies/networks (**Appendix 1**). All participating ICUs obtained ethics committee approval, and either patient consent or ethics committee waiver of consent. National coordinators and/or site investigators (see below, **Appendix 1**) were responsible for obtaining ethics' approval where required, data integrity and validity. Data were collected by means of an electronic case report form (eCRF, Clinfile®, Paris, France). Data quality was subsequently verified on the database and investigators were queried in regard to outlier or inconsistent data. National coordinators (**Appendix 1**) and site investigators (**Appendix 1**) were responsible for obtaining ethics committee approval and for ensuring data integrity and validity. Full methods are described in detail in the primary study paper [1] and in subsequent papers [2, 3].

### ***Patients, Study Design and Data Collection***

Investigators were requested to enroll all patients admitted to their Intensive Care Unit (ICU) within the 4-week enrollment window and receiving invasive mechanical ventilation (MV) or NIV. As previously described [1], exclusion criteria were: age<16 years or inability to obtain informed consent, where required. Following enrollment, patients were evaluated daily for

Acute Hypoxemic Respiratory Failure (AHRF), defined as the concurrent presence of: (1)  $\text{PaO}_2/\text{FiO}_2 \leq 300$  mmHg; (2) new pulmonary parenchymal abnormalities on chest X-Ray or computed tomography; and (3) ventilatory support with continuous positive airway pressure (CPAP) or expiratory positive airway pressure (EPAP) or positive end expiratory pressure (PEEP)  $\geq 5$  cmH<sub>2</sub>O. At this stage, for patients fulfilling criteria for AHRF a more detailed set of data was recorded, which allowed us to determine whether or not the patient fulfilled the Berlin criteria for ARDS.

Data on arterial blood gases, type of ventilatory support with relative settings and Sequential Organ Failure Assessment (SOFA) score were collected on selected days during the ICU stay. Data were collected once per day: if more than one value was available during the day, investigator were asked to record data collected as close as possible to 10 AM. Data on ventilatory settings were recorded simultaneously with arterial blood gas. Decisions to withhold or withdraw life sustaining treatments during the ICU stay and the time at which this decision was taken were recorded (all-time treatment limitations). ICU and hospital survival were collected at the time of discharge, censored at 90 days after enrollment (whichever occurred earlier). Hence, in the manuscript, ICU- and hospital survival indicate the respective values censored at 90 days.

Consistent with our previous reports, we restricted subsequent analyses to patients that fulfilled ARDS criteria (93%) within 48 hours of the onset of acute hypoxemic respiratory failure (AHRF) and who received invasive mechanical ventilation (IMV) [Figure e1].

## ***Data Definitions***

The electronic version of the CRF (eCRF) provided a detailed explanation of what was meant by the term "lung fields abnormal", which included the stipulation for bilateral airspace disease and the fact that atelectasis or effusion should be excluded. In addition, the site investigators received training using an electronic module in the diagnosis of ARDS and had to differentially diagnose ARDS from other common causes of parenchymal lung radiologic changes including heart failure from a clinical summary and the CXR.

For the purposes of this analysis, sex assignment was made by the site investigators at the time of data entry. Lower tidal volume ventilation was defined as a tidal volume of  $\leq 8\text{ml/kg PBW}$ . In patients in whom plateau pressure was measured, lung protective ventilation (LPV) was defined as tidal volume of  $\leq 8\text{ml/kg ideal body weight (IBW) PBW}$  combined with a plateau pressure of  $\leq 30\text{ cmH}_2\text{O}$ . From the variables originally collected we also derived: 1) dynamic compliance ( $\text{ml/cmH}_2\text{O}$ ) as the ratio between tidal volume and the difference between peak inspiratory pressure and PEEP; 2) body mass index (BMI) as the ratio between weight (kilograms) and the square of the body height (metres). **We used the threshold of 1.69 meters (median height value) to classify shorter versus taller patients.** Gross domestic product (GDP) per person was obtained through World Bank database that gather time series data for all countries, on a variety of socio-economic topics. GDP was used to define three major geo-economic groupings: high-income countries in Europe, high-income countries in the rest of the world, and middle-income countries.

Duration of IMV was calculated as the number of days between the date of intubation and the date of extubation in ICU (or death, if the patient died under IMV). Similarly, invasive ventilator-free days were calculated as the number of days from weaning from IMV to day 28, while

patients who died before weaning were considered to have a ventilator-free-day value of 0.

Length of stay (LOS) in ICU and in hospital was evaluated as the number of days between date of admission into the ICU and the date of discharge from ICU and hospital, respectively.

Driving pressure was defined as plateau pressure minus PEEP. Plateau and driving pressure analysis confined to patients (n=742) in whom plateau pressure was measured and in whom there was no evidence of spontaneous ventilation (i.e. when set and measured respiratory rates were equal). All modes other than volume and pressure control modes were considered to permit spontaneous breathing.

Because we previously observed significant association between presence of ARDS at second day and outcomes [4], ARDS severity was reclassified ('resolved' versus 'confirmed' ARDS) on second day using the Berlin criteria. In detail, patients were considered to have 'resolved' ARDS when they initially fulfilled the Berlin ARDS criteria but did not fulfill at least one criterion on day 2. Patients were considered to have 'confirmed' ARDS when they continued to fulfill the Berlin definition when reassessed on day 2. Where chest radiography was not present at day 2, patients could only be considered to have confirmed ARDS if the other criteria were still present. Where data on PEEP were missing at day 2, patients were considered to have confirmed ARDS if: (a) the other criteria were fulfilled, and (b) there were data on the third day indicating ongoing assisted ventilation with a PEEP of 5 cmH<sub>2</sub>O or greater. Patients could not be deemed to have resolved ARDS if any of the day 2 data was missing.

### ***Quality control***

At the time of data entry, the site investigators were required to answer all queries raised by the case report form before they could electronically finalize a patient dataset. Patient datasets

that were not finalized were not included in the analysis. In addition, prior to analysis, all data were screened for potentially erroneous data and outliers; these data were verified/corrected by LUNG-SAFE site investigators. We followed the STROBE (Strengthening The Reporting of OBservational studies in Epidemiology) statement guidelines for observational cohort studies [5].

### ***Study size***

We wished to enroll at least 1000 patients with ARDS. Assuming a 30% mortality, 300 deaths would allow us to evaluate at least 30 associated variables in multivariable models [6]. Prior epidemiologic studies reported an ARDS incidence ranging between 2.2-19% of ICU patients [7-10]. Based on a conservative a priori estimate that 5% of ICU admissions would have ARDS, and projecting that a medium-sized ICU admits 50 patients per month, we planned to enroll at least 500 ICUs world-wide.

### ***Data Management and Statistical Analyses***

Descriptive statistics were reported for the study population stratified according to sex, and they included proportions for categorical and mean (standard deviation) or median (interquartile range) for continuous variables. No assumptions were made for missing data, which were rare. Comparisons between groups were performed using chi-squared test (or Fisher exact test) for discrete variables, Student's t-test (or Wilcoxon-Mann Whitney test) for continuous variables. The Shapiro-Wilk test was used to assess normality in data distribution. The Kaplan Meier approach was applied to assess the probability of discontinuing IMV in ICU, and the probability of hospital survival and of being discharged alive during hospital stay. When

assessing the probability of discontinuing IMV in ICU, patients that weaned from IMV after 28 days in ICU are considered as censored at day 28. When assessing the probability of being discharged alive from hospital, patients that died before day 90 were considered as censored at date of death, while patients discharged after day 90 were considered as censored at day 90. Log-rank test was used to compare curves between the male and female population.

To evaluate the existence of a possible effect of sex on mortality, lower tidal volume ventilation (tidal volume  $\leq 8$  ml/kg of ideal body weight) during the first day of ARDS, LOS and on duration of IMV adjusting for all plausible confounders, we applied generalized linear mixed models with random intercept, taking into account the correlation among patients within the same ICU of enrolment. Patients died before ICU discharge were removed from analysis of LOS and duration of IMV. In detail, logistic link function and binomial distribution of outcome were used to analyse mortality and lower tidal volume ventilation, while log link function and Poisson distribution were used for LOS and for duration of IMV. In the first case, results were reported as odds ratio (OR) with 95% confidence interval (CI), while in the second as incidence rate ratio (IRR) and 95% CI. Because some ICUs had few observations to support the normal assumption, bootstrap method were used (1000 samples randomly extracted) to estimate the model parameters.

Predictors used in the multivariable models were detected through stepwise regression approach that combines forward and backward selection methods in an iterative procedure (significance level of 0.05 both for entry and retention). Potential independent predictors were: patient characteristics at baseline (age, sex, body mass index (BMI), geo-economic area), chronic disease (chronic obstructive pulmonary disease (COPD), diabetes mellitus, immune-incompetence, cardiac failure, renal failure, liver failure), presence of ARDS risk factors, ICU's

characteristics (number of beds, proportion of ICU beds in hospital, number of beds per physician and per nurse, academic ICU), clinical parameters measured at second day from ARDS onset (total respiratory rate, tidal volume, presence of controlled ventilation, PEEP, standardized minute ventilation, ARDS severity, dynamic compliance, partial pressure of carbon dioxide ( $\text{PaCO}_2$ ), pH, non-pulmonary sequential organ failure assessment (SOFA) score, presence of adjunctive measures performed during two day from ARDS onset). Moreover, when sex was identified as a statistical significant predictor, we also evaluated its interaction with other selected predictors.

All p-values were two-sided, with p-values  $<0.05$  considered as statistically significant.

Statistical analyses were performed with R, version 3.5.2. (R Project for Statistical Computing, <http://www.R-project.org>) and SAS software, version 9.4 (SAS Institute, Cary, NC, USA).



## Supplemental Tables

**Table e1.** Ventilatory management and illness severity of female and male patients on second day of ARDS.

|                                                                         | Female             | Male               | p-value <sup>0</sup> |
|-------------------------------------------------------------------------|--------------------|--------------------|----------------------|
| Patients in ICU at 2 <sup>nd</sup> day, n (%)                           | 871 (96.24)        | 1,427 (96.94)      | 0.3553               |
| <b>Invasive ventilation settings (2<sup>nd</sup> day)</b>               |                    |                    |                      |
| Patients undergoing controlled ventilation, n (%)                       | 478 (59.4)         | 535 (40.9)         | 0.8872               |
| Patients undergoing spontaneous ventilation, n (%)                      |                    |                    |                      |
| All patients                                                            | 327 (40.6)         | 535 (40.9)         | 0.8872               |
| Resolved ARDS                                                           | 71 (47.3)          | 115 (44.2)         | 0.5433               |
| Mild                                                                    | 97 (46.2)          | 147 (46.0)         | 0.9286               |
| Moderate                                                                | 115 (38.9)         | 194 (37.4)         | 0.6771               |
| Severe                                                                  | 26 (27.7)          | 46 (32.2)          | 0.4604               |
| Set respiratory rate (breaths/min), mean ± SD                           | 18.5 ± 7.0         | 18.8 ± 6.6         | 0.1782               |
| Total respiratory rate (breaths/min), mean ± SD                         | 21.0 ± 6.3         | 20.8 ± 6.1         | 0.9149               |
| Tidal volume (ml/kg IBW), mean ± SD                                     |                    |                    |                      |
| All patients                                                            | 8.1 ± 2.3          | 7.4 ± 1.7          | <.0001               |
| Patients with control ventilation                                       | 7.9 ± 2.0          | 7.1 ± 1.4          | <.0001               |
| Patients with spontaneous ventilation                                   | 8.5 ± 2.7          | 7.8 ± 2.0          | <.0001               |
| P-value (control vs spontaneous ventilation)                            | 0.0008             | <.0001             | -                    |
| Lower tidal volume <sup>1</sup> , n (%)                                 | 388 (51.1)         | 875 (70.5)         | <.0001               |
| Set PEEP (cmH <sub>2</sub> O), mean ± SD                                | 8.6 ± 3.6          | 8.5 ± 3.4          | 0.9978               |
| Peak pressure <sup>2</sup> (cmH <sub>2</sub> O), mean ± SD              | 27.0 ± 8.4         | 25.7 ± 7.9         | 0.0004               |
| Dynamic compliance (ml/cmH <sub>2</sub> O), mean ± SD                   | 27.79 ± 17.69      | 34.41 ± 26.82      | <.0001               |
| Patients in whom P <sub>PLAT</sub> measured, n (%)                      | 300 (34.4)         | 511 (35.8)         | 0.5061               |
| P <sub>PLAT</sub> (cmH <sub>2</sub> O) <sup>3</sup> , mean ± SD         | 23.9 ± 5.8         | 22.4 ± 5.5         | 0.0005               |
| Driving pressure (cmH <sub>2</sub> O) <sup>3</sup> , mean ± SD          | 15.1 ± 5.5         | 13.5 ± 4.8         | 0.0001               |
| Standardized minute ventilation (l/min) <sup>4</sup> , mean ± SD        | 9.39 ± 4.28        | 11.21 ± 4.49       | <.0001               |
| Standardized minute ventilation (l/min/Kg IBW) <sup>4</sup> , mean ± SD | 0.18 ± 0.08        | 0.16 ± 0.07        | <.0001               |
| <b>Gas exchange (2<sup>nd</sup> day)</b>                                |                    |                    |                      |
| P <sub>a</sub> O <sub>2</sub> / FiO <sub>2</sub> (mmHg), mean ± SD      | 195.6 ± 85.8       | 196 ± 86.2         | 0.9636               |
| SpO <sub>2</sub> , median [IQR]                                         | 97.0 [94.0 ; 98.0] | 97.0 [95.0 ; 98.0] | 0.1328               |
| P <sub>a</sub> CO <sub>2</sub> (mmHg), mean ± SD                        | 43.7 ± 14.5        | 44.0 ± 12.4        | 0.0549               |
| <35                                                                     | 163 (20.8)         | 241 (18.4)         | 0.1873               |
| 35 – 45                                                                 | 354 (45.1)         | 584 (44.7)         | 0.8341               |
| ≥ 45                                                                    | 267 (34.1)         | 482 (36.9)         | 0.1926               |
| pH, mean ± SD                                                           | 7.37 ± 0.10        | 7.37 ± 0.10        | 0.1204               |
| <b>Severity profile (2<sup>nd</sup> day)</b>                            |                    |                    |                      |
| ARDS severity <sup>5</sup> , n (%)                                      |                    |                    | 0.5114               |
| Resolved ARDS, n (%)                                                    | 179 (22.7)         | 324 (24.4)         |                      |
| Mild, n (%)                                                             | 215 (27.3)         | 331 (25.0)         |                      |
| Moderate, n (%)                                                         | 300 (38.1)         | 525 (39.6)         |                      |
| Severe, n (%)                                                           | 94 (11.9)          | 146 (11.0)         |                      |
| SOFA score <sup>6</sup> , mean ± SD                                     | 9.5 ± 4.6          | 9.7 ± 4.5          | 0.1439               |
| Non pulmonary SOFA score <sup>6</sup> , mean ± SD                       | 6.8 ± 4.3          | 7.0 ± 4.2          | 0.3144               |

|                                 |                 |                 |        |
|---------------------------------|-----------------|-----------------|--------|
| FiO <sub>2</sub> , median [IQR] | 0.5 [0.4 ; 0.6] | 0.5 [0.4 ; 0.6] | 0.9865 |
|---------------------------------|-----------------|-----------------|--------|

---

Abbreviations: ARDS: Acute Respiratory Distress Syndrome; FiO<sub>2</sub>: Fraction of Inspired oxygen; IBW: Ideal Body Weight; IQR: interquartile range (1<sup>st</sup> quartile and 3<sup>rd</sup> quartile); P<sub>a</sub>CO<sub>2</sub> partial pressure of carbon dioxide; P<sub>a</sub>O<sub>2</sub>: arterial oxygen partial pressure; PEEP: Positive End-Expiratory Pressure; P<sub>PLAT</sub>: Plateau Pressure; SD: Standard Deviation; SOFA: Sequential Organ Failure Assessment; SpO<sub>2</sub>: peripheral oxygen saturation.

0. Comparison of male versus female patients.

1. Low tidal volume was defined as tidal volume  $\leq 8$  ml/IBW kg.
2. For peak pressure measurements patients receiving high frequency oscillatory ventilation (HFOV) or extracorporeal membrane oxygenation (ECMO) were excluded.
3. P<sub>PLAT</sub> and driving pressure values are limited to patients in whom this value was reported, and in whom either an assist control mode was used or, where a mode permitting spontaneous ventilation was used, the set and total respiratory rates were equal. Patients receiving HFOV or ECMO were also excluded.
4. Standardized minute ventilation was calculated as minute ventilation  $\times$  P<sub>a</sub>CO<sub>2</sub> / 40.
5. At day 2, ARDS severity profile was evaluable for 788 females (90.5% on females in ICU at day 2) and for 1,326 males (92.9% on males in ICU at day 2).
6. For all SOFA scores, where data points were missing, this value was omitted and the denominator adjusted accordingly.

**Table e2.** Impact of sex on outcomes stratified by ARDS severity on second day of ARDS (n=2,377).

|                                                                                             | Female<br>(n = 905) | Male<br>(n = 1,472) | p-value <sup>1</sup> |
|---------------------------------------------------------------------------------------------|---------------------|---------------------|----------------------|
| <b>ICU mortality, n (%)</b>                                                                 |                     |                     |                      |
| All patients                                                                                | 320 (35.4)          | 518 (35.2)          | 0.9333               |
| Resolved ARDS                                                                               | 40 (22.3)           | 92 (28.4)           | 0.1399               |
| Mild ARDS                                                                                   | 57 (26.5)           | 100 (30.2)          | 0.3507               |
| Moderate ARDS                                                                               | 103 (34.3)          | 183 (34.9)          | 0.8791               |
| Severe ARDS                                                                                 | 60 (63.8)           | 67 (45.9)           | 0.0066               |
| <b>Hospital mortality <sup>2</sup>, n (%)</b>                                               |                     |                     |                      |
| All patients                                                                                | 362 (40.2)          | 590 (40.2)          | 0.9844               |
| Resolved ARDS                                                                               | 50 (28.1)           | 105 (32.7)          | 0.2853               |
| Mild ARDS                                                                                   | 70 (33.0)           | 123 (37.2)          | 0.3128               |
| Moderate ARDS                                                                               | 116 (38.7)          | 206 (39.2)          | 0.8714               |
| Severe ARDS                                                                                 | 64 (68.1)           | 73 (50.3)           | 0.0068               |
| <b>Invasive ventilator-free days (days) <sup>3</sup> in ICU, median [IQR]</b>               |                     |                     |                      |
| All patients                                                                                | 13.0 [0.0 ; 23]     | 10.5 [0.0 ; 22.0]   | 0.1616               |
| Resolved ARDS                                                                               | 21.0 [0.0 ; 25.0]   | 17.0 [0.0 ; 25.0]   | 0.2537               |
| Mild ARDS                                                                                   | 19.0 [0.0 ; 24.0]   | 17.0 [0.0 ; 24.0]   | 0.6306               |
| Moderate ARDS                                                                               | 10.5 [0.0 ; 22.0]   | 8.5 [0.0 ; 20.0]    | 0.1383               |
| Severe ARDS                                                                                 | 0.0 [0.0 ; 0.0]     | 0.0 [0.0 ; 15.0]    | 0.0697               |
| Survivors at ICU discharge                                                                  | 22.0 [16.0 ; 25.0]  | 20.0 [13.0 ; 25.0]  | 0.0134               |
| Resolved ARDS                                                                               | 24.0 [19.0 ; 26.0]  | 24.0 [16.5 ; 26.0]  | 0.9149               |
| Mild ARDS                                                                                   | 22.0 [16.5 ; 25.0]  | 22.0 [16.0 ; 25.0]  | 0.7616               |
| Moderate ARDS                                                                               | 20.0 [12.0 ; 23.0]  | 18.0 [10.0 ; 23.0]  | 0.0406               |
| Severe ARDS                                                                                 | 19.0 [10.0 ; 23.0]  | 15.0 [0.0 ; 20.0]   | 0.0624               |
| <b>Duration of invasive mechanical ventilation (days) <sup>4</sup> in ICU, median [IQR]</b> |                     |                     |                      |
| All patients                                                                                | 7.0 [4.0 ; 13.0]    | 9.0 [4.0 ; 16.0]    | 0.0044               |
| Resolved ARDS                                                                               | 6.0 [4.0 ; 12.0]    | 7.0 [3.0 ; 13.5]    | 0.5995               |
| Mild ARDS                                                                                   | 8.0 [4.0 ; 14.0]    | 8.0 [4.0 ; 15.0]    | 0.7828               |
| Moderate ARDS                                                                               | 9.0 [5.0 ; 17.0]    | 11.0 [6.0 ; 19.0]   | 0.0231               |
| Severe ARDS                                                                                 | 8.0 [3.0 ; 16.0]    | 11.0 [5.0 ; 21.0]   | 0.0074               |
| Survivors at ICU discharge                                                                  | 7.0 [4.0 ; 13.0]    | 9.0 [4.0 ; 16.0]    | 0.0124               |
| Resolved ARDS                                                                               | 5.0 [3.0 ; 10.0]    | 5.0 [3.0 ; 12.5]    | 0.9094               |
| Mild ARDS                                                                                   | 7.0 [4.0 ; 12.5]    | 7.0 [4.0 ; 13.0]    | 0.7563               |
| Moderate ARDS                                                                               | 9.0 [6.0 ; 17.0]    | 11.0 [6.0 ; 19.0]   | 0.0358               |
| Severe ARDS                                                                                 | 10.0 [6.0 ; 19.0]   | 14.0 [9.0 ; 31.0]   | 0.0587               |
| <b>Length of stay in ICU (days) <sup>5</sup> , median [IQR]</b>                             |                     |                     |                      |
| All patients                                                                                | 9.0 [5.0 ; 17.0]    | 11.0 [6.0 ; 20.0]   | 0.0014               |
| Resolved ARDS                                                                               | 8.0 [5.0 ; 15.0]    | 9.5 [5.0 ; 19.0]    | 0.6258               |
| Mild ARDS                                                                                   | 11.0 [7.0 ; 17.0]   | 11.0 [6.0 ; 18.0]   | 0.6009               |
| Moderate ARDS                                                                               | 12.0 [7.0 ; 21.0]   | 14.0 [8.0 ; 23.0]   | 0.0264               |
| Severe ARDS                                                                                 | 8.5 [4.0 ; 18.0]    | 13.5 [5.0 ; 25.0]   | 0.0056               |
| Survivors at ICU discharge                                                                  | 11.0 [6.0 ; 18.0]   | 12.0 [7.0 ; 22.0]   | 0.0094               |
| Resolved ARDS                                                                               | 8.0 [5.0 ; 14.0]    | 9.0 [5.0 ; 19.5]    | 0.5724               |
| Mild ARDS                                                                                   | 11.0 [7.0 ; 16.0]   | 11.0 [6.0 ; 18.0]   | 0.6144               |

|                                                                         |                    |                    |        |
|-------------------------------------------------------------------------|--------------------|--------------------|--------|
| Moderate ARDS                                                           | 13.0 [8.0 ; 23.0]  | 15.0 [9.0 ; 25.0]  | 0.0682 |
| Severe ARDS                                                             | 12.0 [7.0 ; 21.0]  | 17.0 [10.0 ; 31.0] | 0.0669 |
| <b>Length of stay in hospital (days) <sup>6</sup> , median [IQR]</b>    |                    |                    |        |
| All patients                                                            | 16.0 [8.0 ; 29.0]  | 18.0 [9.0 ; 35.0]  | 0.0006 |
| Resolved ARDS                                                           | 16.0 [9.0 ; 31.0]  | 16.0 [9.0 ; 32.0]  | 0.9428 |
| Mild ARDS                                                               | 19.0 [11.0 ; 35.5] | 19.0 [11.0 ; 35.0] | 0.5340 |
| Moderate ARDS                                                           | 17.0 [9.0 ; 30.0]  | 20.5 [10.5 ; 40.0] | 0.0029 |
| Severe ARDS                                                             | 10.0 [4.0 ; 21.0]  | 18.0 [6.0 ; 39.0]  | 0.0003 |
| Survivors at hospital discharge                                         | 21.0 [13.0 ; 36.0] | 25.0 [14.0 ; 44.0] | 0.0012 |
| Resolved ARDS                                                           | 19.0 [12.0 ; 33.5] | 23.0 [11.0 ; 40.0] | 0.2820 |
| Mild ARDS                                                               | 24.0 [14.0 ; 40.0] | 22.5 [14.0 ; 41.0] | 0.8964 |
| Moderate ARDS                                                           | 23.0 [14.0 ; 37.0] | 27.0 [16.0 ; 52.0] | 0.0033 |
| Severe ARDS                                                             | 20.5 [10.0 ; 31.5] | 32.0 [16.0 ; 51.0] | 0.0124 |
| <b>Limitation of life sustaining measures in ICU, n (%)</b>             |                    |                    |        |
| All patients                                                            | 225 (24.9)         | 353 (24.0)         | 0.6269 |
| Resolved ARDS                                                           | 41 (22.9)          | 68 (21.0)          | 0.6173 |
| Mild ARDS                                                               | 48 (22.3)          | 73 (22.1)          | 0.9406 |
| Moderate ARDS                                                           | 67 (22.3)          | 130 (24.8)         | 0.4312 |
| Severe ARDS                                                             | 36 (38.3)          | 43 (29.5)          | 0.1546 |
| Deaths in ICU after limitation, n (%) <sup>7</sup>                      | 179 (79.6)         | 285 (80.7)         | 0.7279 |
| All patients (with limitation)                                          |                    |                    |        |
| Resolved ARDS                                                           | 27 (65.9)          | 55 (80.9)          | 0.0783 |
| Mild ARDS                                                               | 37 (77.1)          | 53 (72.6)          | 0.5807 |
| Moderate ARDS                                                           | 53 (79.1)          | 111 (85.4)         | 0.2635 |
| Severe ARDS                                                             | 32 (88.9)          | 32 (74.4)          | 0.1024 |
| <b>Time to limitation in ICU, mean <math>\pm</math> SE <sup>8</sup></b> |                    |                    |        |
| All patients (with limitation)                                          | 50.5 $\pm$ 3.1     | 54.7 $\pm$ 1.9     | 0.0834 |
| Resolved ARDS                                                           | 44.8 $\pm$ 3.4     | 58.7 $\pm$ 4.2     | 0.4607 |
| Mild ARDS                                                               | 48.6 $\pm$ 6.0     | 55.3 $\pm$ 4.2     | 0.8187 |
| Moderate ARDS                                                           | 58.1 $\pm$ 4.2     | 56.0 $\pm$ 3.0     | 0.5169 |
| Severe ARDS                                                             | 47.9 $\pm$ 5.9     | 49.2 $\pm$ 5.2     | 0.0321 |

Abbreviations: ARDS: Acute Respiratory Distress Syndrome; ICU: Intensive Care Unit; IQR: interquartile range (1<sup>st</sup> quartile; 3<sup>rd</sup> quartile). SE: standard error.

1. Comparison of male versus female patients.

2. Vital status at hospital discharge was not evaluable for 9 patients (4 females and 5 males).

3. Invasive ventilator-free days were calculated as the number of days from weaning from invasive mechanical ventilation to the date of ICU discharge. Patients who died before weaning were considered to have a ventilator-free-day value of 0.

4. Duration of invasive mechanical ventilation was assessed during ICU stay and it was calculated as the number of days between the date of intubation and the date of extubation performed in ICU.

5. Length of stay in ICU was calculated as the number of days between the date of ICU admission and the date of ICU discharge (or 90 when discharge occurred after 90 days).

6. Length of stay in hospital was calculated as the number of days between the date of ICU admission and the date of hospital discharge (or 90 when discharge occurred after 90 days).

7. Percentage is calculated on patients with limitation of life sustaining measures.

8. Mean time to limitation of life sustaining measures in ICU was estimated with Kaplan-Meier approach, considering as censored those patients discharged from ICU.

**Table e3.** Tests of Fixed Effects in linear model for repeated measures of tidal volume.

| Effect                                             | F value | p-value |
|----------------------------------------------------|---------|---------|
| Sex                                                | 95.80   | <.0001  |
| Day of follow-up                                   | 1.92    | 0.0537  |
| Interaction term [ <i>Sex × Day of follow-up</i> ] | 1.59    | 0.1215  |

**Table e4.** Factors associated with the use of lower tidal volume (tidal volume of  $\leq 8$ ml/kg IBW) at the first day of ARDS.

| Parameter                                                                       | OR (95% CI)           |
|---------------------------------------------------------------------------------|-----------------------|
| Total respiratory rate (breaths/min)                                            | 1.106 (1.085-1.130)   |
| PaCO <sub>2</sub> (mmHg)                                                        | 1.028 (1.019-1.038)   |
| Controlled ventilation (ref. Spontaneous)                                       | 2.023 (1.564-2.616)   |
| Geoeconomic area (ref. Europe high income)                                      |                       |
| Rest of World high income                                                       | 1.464 (1.027-2.086)   |
| Middle income                                                                   | 1.440 (0.991-2.090)   |
| pH (0.1 unit)                                                                   | 1.014 (1.003-1.024)   |
| Chronic liver failure (ref. No)                                                 | 1.877 (1.013-3.479)   |
| No adjunctive measures during 1 <sup>st</sup> or 2 <sup>nd</sup> day (ref. Yes) | 1.317 (1.009-1.719)   |
| Male (ref. Female)                                                              |                       |
| Height < 1.70 m                                                                 | 2.602 (1.297-5.220)   |
| Height $\geq 1.70$ m                                                            | 0.772 (0.414-1.442)   |
| <b>Random effects, estimate (95% CI )</b>                                       |                       |
| Intercept for ICU cluster, SD                                                   | 0.840 (0.667 ; 1.059) |

**Table e5.** Generalized linear mixed models on patients in ICU at the second day (n=2,298).

| <b>Outcome – Length of stay in ICU in survivors at ICU discharge (n=1,523)</b>                              |  | <b>IRR (95% CI)</b>   |
|-------------------------------------------------------------------------------------------------------------|--|-----------------------|
| <b>Fixed effects</b>                                                                                        |  |                       |
| Sex (ref. Female)                                                                                           |  | 1.260 (1.213 ; 1.309) |
| Age (years)                                                                                                 |  | 1.002 (1.001 ; 1.003) |
| Adjunctive measures during 1 <sup>st</sup> or 2 <sup>nd</sup> day (ref. Yes)                                |  | 0.812 (0.777 ; 0.848) |
| Adjusted non-pulmonary SOFA score at 2 <sup>nd</sup> day                                                    |  | 1.021 (1.016 ; 1.026) |
| Dynamic compliance at 2 <sup>nd</sup> day (ml/cmH <sub>2</sub> O)                                           |  | 0.994 (0.993 ; 0.995) |
| PEEP at 2 <sup>nd</sup> day (cmH <sub>2</sub> O)                                                            |  | 1.016 (1.010 ; 1.022) |
| ARDS severity at 2 <sup>nd</sup> day (ref. Resolved ARDS)                                                   |  |                       |
| Mild ARDS at 2 <sup>nd</sup> day                                                                            |  | 0.961 (0.912 ; 1.013) |
| Moderate ARDS at 2 <sup>nd</sup> day                                                                        |  | 1.093 (1.040 ; 1.148) |
| Severe ARDS at 2 <sup>nd</sup> day                                                                          |  | 1.260 (1.169 ; 1.358) |
| <b>Random effects, estimate (95% CI )</b>                                                                   |  |                       |
| Intercept for ICU cluster, SD                                                                               |  | 0.573 (0.524 ; 0.625) |
| <b>Outcome – Length of stay in hospital in survivors patients at hospital discharge (n=1,400)</b>           |  | <b>IRR (95% CI)</b>   |
| <b>Fixed effects</b>                                                                                        |  |                       |
| Sex (ref. Female)                                                                                           |  | 1.181 (1.147 ; 1.216) |
| Age (year)                                                                                                  |  | 1.002 (1.002 ; 1.003) |
| Chronic cardiac failure (ref. No)                                                                           |  | 0.747 (0.707 ; 0.789) |
| Adjusted non-pulmonary SOFA score at 2 <sup>nd</sup> day                                                    |  | 1.028 (1.024 ; 1.031) |
| Dynamic compliance at 2 <sup>nd</sup> day (ml/cmH <sub>2</sub> O)                                           |  | 0.998 (0.997 ; 0.998) |
| PEEP at 2 <sup>nd</sup> day (cmH <sub>2</sub> O)                                                            |  | 1.012 (1.008 ; 1.017) |
| Geo-economic area (ref. Rest of World high income)                                                          |  |                       |
| Europe high income                                                                                          |  | 1.335 (1.133 ; 1.574) |
| Middle income                                                                                               |  | 1.184 (0.983 ; 1.425) |
| <b>Random effects, estimate (95% CI )</b>                                                                   |  |                       |
| Intercept for ICU cluster, SD                                                                               |  | 0.547 (0.502 ; 0.596) |
| <b>Outcome – Duration of mechanical ventilation in ICU in surviving patients at ICU discharge (n=1,523)</b> |  | <b>IRR (95% CI)</b>   |
| <b>Fixed effects</b>                                                                                        |  |                       |
| Sex (ref. Female)                                                                                           |  | 1.247 (1.190 ; 1.307) |
| COPD (ref. No)                                                                                              |  | 0.845 (0.799 ; 0.894) |
| Chronic liver failure (ref. No)                                                                             |  | 0.687 (0.589 ; 0.801) |
| Adjunctive measures during 1 <sup>st</sup> or 2 <sup>nd</sup> day (ref. Yes)                                |  | 0.858 (0.814 ; 0.905) |
| Mode control of ventilation at 2 <sup>nd</sup> day (ref. No)                                                |  | 1.176 (1.113 ; 1.242) |
| Adjusted non-pulmonary SOFA score at 2 <sup>nd</sup> day                                                    |  | 1.030 (1.024 ; 1.037) |
| Dynamic compliance at 2 <sup>nd</sup> day (ml/cmH <sub>2</sub> O)                                           |  | 0.994 (0.993 ; 0.995) |
| PEEP at 2 <sup>nd</sup> day (cmH <sub>2</sub> O)                                                            |  | 1.017 (1.010 ; 1.024) |
| ARDS severity at 2 <sup>nd</sup> day (ref. Resolved ARDS)                                                   |  |                       |
| Mild ARDS at 2 <sup>nd</sup> day                                                                            |  | 0.948 (0.889 ; 1.012) |
| Moderate ARDS at 2 <sup>nd</sup> day                                                                        |  | 1.073 (1.010 ; 1.140) |
| Severe ARDS at 2 <sup>nd</sup> day                                                                          |  | 1.490 (1.361 ; 1.631) |
| <b>Random effects, estimate (95% CI )</b>                                                                   |  |                       |
| Intercept for ICU cluster, SD                                                                               |  | 0.635 (0.580 ; 0.696) |

| <b>Outcome – Hospital mortality (90 days) (n=2,298)</b>     |  | <b>OR (95% CI)</b>    |
|-------------------------------------------------------------|--|-----------------------|
| <b>Fixed effects</b>                                        |  |                       |
| Age (year)                                                  |  | 1.026 (1.018 ; 1.033) |
| BMI (kg/m <sup>2</sup> )                                    |  | 0.974 (0.957 ; 0.991) |
| Immuno-incompetence (ref. No)                               |  | 1.933 (1.436 ; 2.601) |
| Chronic liver failure (ref. No)                             |  | 2.441 (1.330 ; 4.479) |
| pH at 2 <sup>nd</sup> day (0.1 unit)                        |  | 0.976 (0.964 ; 0.989) |
| Adjusted non-pulmonary SOFA score at 2 <sup>nd</sup> day    |  | 1.151 (1.114 ; 1.189) |
| Total respiratory rate at 2 <sup>nd</sup> day (breaths/min) |  | 1.047 (1.026 ; 1.069) |
| Geo-economic area (ref. Middle income)                      |  |                       |
| Europe high income                                          |  | 0.662 (0.463 ; 0.946) |
| Rest of World high income                                   |  | 0.432 (0.282 ; 0.663) |
| Resolved ARDS at 2 <sup>nd</sup> day                        |  |                       |
| Sex (ref. Female)                                           |  | 0.957 (0.548 ; 1.672) |
| Mild ARDS at 2 <sup>nd</sup> day                            |  |                       |
| Sex (ref. Female)                                           |  | 1.326 (0.643 ; 2.734) |
| Moderate ARDS at 2 <sup>nd</sup> day                        |  |                       |
| Sex (ref. Female)                                           |  | 1.075 (0.550 ; 2.103) |
| Severe ARDS at 2 <sup>nd</sup> day                          |  |                       |
| Sex (ref. Female)                                           |  | 0.347 (0.144 ; 0.833) |
| <b>Random effects, estimate (95% CI )</b>                   |  |                       |
| Intercept for ICU cluster, SD                               |  | 0.624 (0.432 ; 0.903) |
| <b>Outcome – ICU mortality (90 days) (n=2,298)</b>          |  | <b>OR (95% CI)</b>    |
| <b>Fixed effects</b>                                        |  |                       |
| Age (year)                                                  |  | 1.019 (1.011 ; 1.027) |
| BMI (kg/m <sup>2</sup> )                                    |  | 0.979 (0.962 ; 0.997) |
| Immuno-incompetence (ref. No)                               |  | 1.791 (1.325 ; 2.422) |
| Chronic liver failure (ref. No)                             |  | 2.228 (1.224 ; 4.057) |
| pH at 2 <sup>nd</sup> day (0.1 unit)                        |  | 0.974 (0.962 ; 0.987) |
| Adjusted non-pulmonary SOFA score at 2 <sup>nd</sup> day    |  | 1.157 (1.119 ; 1.196) |
| Total respiratory rate at 2 <sup>nd</sup> day (breaths/min) |  | 1.059 (1.037 ; 1.081) |
| Geo-economic area (ref. Middle income)                      |  |                       |
| Europe high income                                          |  | 0.600 (0.416 ; 0.866) |
| Rest of World high income                                   |  | 0.383 (0.246 ; 0.596) |
| Resolved ARDS at 2 <sup>nd</sup> day                        |  |                       |
| Sex (ref. Female)                                           |  | 1.183 (0.660 ; 2.119) |
| Mild ARDS at 2 <sup>nd</sup> day                            |  |                       |
| Sex (ref. Female)                                           |  | 0.914 (0.429 ; 1.949) |
| Moderate ARDS at 2 <sup>nd</sup> day                        |  |                       |
| Sex (ref. Female)                                           |  | 0.823 (0.410 ; 1.652) |
| Severe ARDS at 2 <sup>nd</sup> day                          |  |                       |
| Sex (ref. Female)                                           |  | 0.294 (0.121 ; 0.716) |
| <b>Random effects, estimate (95% CI )</b>                   |  |                       |
| Intercept for ICU cluster, SD                               |  | 0.670 (0.478 ; 0.939) |

Abbreviations: ARDS: Acute Respiratory Distress Syndrome; BMI: body mass index; CI: confidence interval; COPD: Chronic Obstructive Pulmonary Disease; IBW: Ideal Body Weight; ICU: intensive care unit; IRR: incidence rate ratio; OR: odds ratio; PEEP: Positive End-Expiratory Pressure; SD: standard deviation; SOFA: Sequential Organ Failure Assessment.

**Table e6.** Demographics, ventilatory management and illness severity of female and male patients with severe ‘confirmed’ ARDS.

|                                                            | Female      | Male        | p-value <sup>1</sup> |
|------------------------------------------------------------|-------------|-------------|----------------------|
| Patients in ICU at 2 <sup>nd</sup> day with severe ARDS, n | 94          | 146         | -                    |
| Age (years), mean ± SD                                     | 59.0 ± 18.1 | 59.2 ± 17.3 | 0.9878               |
| Height (m), mean ± SD                                      | 1.60 ± 0.08 | 1.72 ± 0.08 | <.0001               |
| BMI (kg/m <sup>2</sup> ), mean ± SD                        | 29.4 ± 10.8 | 27.2 ± 7.2  | 0.6127               |
| <b>Chronic disease, n (%):</b>                             |             |             |                      |
| COPD                                                       | 20 (21.3)   | 36 (24.7)   | 0.5455               |
| Diabetes mellitus                                          | 24 (25.5)   | 33 (22.6)   | 0.6027               |
| Immuno-incompetence (all types)                            | 24 (25.5)   | 25 (17.2)   | 0.1147               |
| Chronic cardiac failure                                    | 10 (10.6)   | 14 (9.6)    | 0.7914               |
| Chronic renal failure                                      | 5 (5.3)     | 11 (7.5)    | 0.5019               |
| Chronic liver failure                                      | 2 (2.13)    | 2 (1.37)    | 0.6457               |
| <b>Risk factor for ARDS <sup>2</sup>, n (%):</b>           |             |             |                      |
| Pneumonia                                                  | 67 (71.3)   | 97 (66.4)   | 0.4316               |
| Non-pulmonary sepsis                                       | 14 (14.9)   | 20 (13.7)   | 0.7955               |
| Aspiration of gastric contents                             | 15 (16.0)   | 18 (12.3)   | 0.4256               |
| Non-cardiogenic shock                                      | 8 (8.5)     | 19 (13.0)   | 0.2812               |
| Major trauma                                               | 0 (0.0)     | 7 (4.8)     | 0.0446               |
| Blood transfusion                                          | 6 (6.4)     | 9 (6.2)     | 0.9456               |
| Pulmonary contusion                                        | 1 (1.1)     | 7 (4.8)     | 0.1534               |
| Inhalation injury                                          | 1 (1.1)     | 7 (4.8)     | 0.1534               |
| Drug overdose                                              | 2 (2.13)    | 0 (0.00)    | 0.1524               |
| Pulmonary vasculitis                                       | 1 (1.1)     | 0 (0.0)     | 0.3917               |
| Severe burns                                               | 1 (1.1)     | 1 (0.7)     | 1.0000               |
| Drowning                                                   | 0 (0.00)    | 0 (0.00)    | -                    |
| Pancreatitis                                               | 0 (0.00)    | 5 (3.42)    | 0.1597               |
| Other                                                      | 2 (2.1)     | 1 (0.7)     | 0.5627               |
| <b>Risk factor for ARDS, n (%):</b>                        |             |             | 0.8636               |
| Only pulmonary risk factors                                | 13 (13.8)   | 26 (17.8)   |                      |
| Only non-pulmonary risk factors                            | 62 (66.0)   | 91 (62.3)   |                      |
| Both                                                       | 15 (16.0)   | 22 (15.1)   |                      |
| No risk factor                                             | 4 (4.3)     | 7 (4.8)     |                      |
| <b>Type of admission, n (%)</b>                            |             |             | 0.6273               |
| Medical                                                    | 79 (84.0)   | 114 (78.1)  |                      |
| Postoperative (elective)                                   | 2 (2.1)     | 3 (2.1)     |                      |
| Surgical                                                   | 11 (11.7)   | 22 (15.1)   |                      |
| Trauma                                                     | 2 (2.1)     | 7 (4.8)     |                      |
| <b>Clinician recognition of ARDS, n (%)</b>                |             |             |                      |
| At baseline                                                | 51 (54.3)   | 87 (59.6)   | 0.4146               |
| During ICU stay                                            | 82 (87.2)   | 130 (89.0)  | 0.6704               |
| <b>Invasive ventilation settings (2<sup>nd</sup> day)</b>  |             |             |                      |
| Patients undergoing controlled ventilation, n (%)          | 68 (72.3)   | 97 (67.8)   | 0.4604               |
| Set respiratory rate (breaths/min), mean ± SD              | 22.7 ± 7.7  | 19.3 ± 7.2  | 0.0008               |
| Total respiratory rate (breaths/min), mean ± SD            | 24.2 ± 7.2  | 22.1 ± 6.0  | 0.0182               |



|                                                                             |                    |                    |        |
|-----------------------------------------------------------------------------|--------------------|--------------------|--------|
| Tidal volume (ml/kg IBW), mean $\pm$ SD                                     |                    |                    |        |
| All patients                                                                | 7.4 $\pm$ 2.4      | 7.2 $\pm$ 1.8      | 0.2336 |
| Patients with control ventilation                                           | 7.7 $\pm$ 2.0      | 7.1 $\pm$ 1.5      | 0.0181 |
| Patients with spontaneous ventilation                                       | 6.7 $\pm$ 3.3      | 7.6 $\pm$ 2.3      | 0.2074 |
| P-value (control vs spontaneous ventilation)                                | 0.1262             | 0.1145             | -      |
| Lower tidal volume <sup>3</sup> , n (%)                                     | 57 (62.6)          | 102 (74.5)         | 0.0572 |
| Set PEEP (cmH <sub>2</sub> O), mean $\pm$ SD                                | 10.4 $\pm$ 3.8     | 10.5 $\pm$ 3.1     | 0.6585 |
| Peak pressure <sup>4</sup> (cmH <sub>2</sub> O), mean $\pm$ SD              | 31.9 $\pm$ 8.6     | 29.7 $\pm$ 7.9     | 0.0268 |
| Dynamic compliance (ml/cmH <sub>2</sub> O), mean $\pm$ SD                   | 20.82 $\pm$ 11.65  | 31.69 $\pm$ 26.72  | <.0001 |
| Patients in whom P <sub>PLAT</sub> measured, n (%)                          | 44 (46.8)          | 62 (42.5)          | 0.5084 |
| P <sub>PLAT</sub> (cmH <sub>2</sub> O) <sup>5</sup> , mean $\pm$ SD         | 27.7 $\pm$ 5.6     | 25.5 $\pm$ 5.3     | 0.0787 |
| Driving pressure (cmH <sub>2</sub> O) <sup>5</sup> , mean $\pm$ SD          | 17.5 $\pm$ 5.6     | 14.7 $\pm$ 4.9     | 0.0195 |
| Standardized minute ventilation (l/min) <sup>6</sup> , mean $\pm$ SD        | 11.68 $\pm$ 5.91   | 13.24 $\pm$ 5.93   | 0.0355 |
| Standardized minute ventilation (l/min/Kg IBW) <sup>6</sup> , mean $\pm$ SD | 0.23 $\pm$ 0.11    | 0.20 $\pm$ 0.09    | 0.0125 |
| <b>Gas exchange (2<sup>nd</sup> day)</b>                                    |                    |                    |        |
| P <sub>a</sub> O <sub>2</sub> / FiO <sub>2</sub> (mmHg), mean $\pm$ SD      | 77.1 $\pm$ 16.3    | 77.9 $\pm$ 15.1    | 0.8917 |
| SpO <sub>2</sub> , median [IQR]                                             | 94.0 [89.0 ; 96.0] | 93.0 [90.0 ; 95.0] | 0.4423 |
| P <sub>a</sub> CO <sub>2</sub> (mmHg), mean $\pm$ SD                        | 53.2 $\pm$ 24.4    | 50.2 $\pm$ 17.2    | 0.9870 |
| <35                                                                         | 15 (16.0)          | 19 (13.1)          | 0.5372 |
| 35 – 45                                                                     | 26 (27.7)          | 50 (34.5)          | 0.2685 |
| $\geq$ 45                                                                   | 53 (56.4)          | 76 (52.4)          | 0.5476 |
| pH, mean $\pm$ SD                                                           | 7.31 $\pm$ 0.14    | 7.31 $\pm$ 0.12    | 0.6771 |
| <b>Severity profile (2<sup>nd</sup> day)</b>                                |                    |                    |        |
| SOFA score <sup>7</sup> , mean $\pm$ SD                                     | 12.7 $\pm$ 4.4     | 12.5 $\pm$ 4.5     | 0.7545 |
| Non pulmonary SOFA score <sup>7</sup> , mean $\pm$ SD                       | 8.2 $\pm$ 4.3      | 7.8 $\pm$ 4.1      | 0.5798 |
| FiO <sub>2</sub> , median [IQR]                                             | 0.9 [0.8 ; 1.0]    | 0.9 [0.8 ; 1.0]    | 0.8330 |
| <b>Adjunctive measures (first 48 hours)</b>                                 |                    |                    |        |
| Neuromuscular blockade                                                      | 37 (39.4)          | 45 (30.8)          | 0.1733 |
| Recruitment maneuvers                                                       | 31 (33.0)          | 41 (28.1)          | 0.4191 |
| Prone positioning                                                           | 17 (18.1)          | 15 (10.3)          | 0.0823 |
| ECMO                                                                        | 12 (12.8)          | 5 (3.4)            | 0.0059 |
| Inhaled vasodilators                                                        | 18 (19.1)          | 8 (5.5)            | 0.0009 |
| HFOV                                                                        | 0 (0.0)            | 1 (0.7)            | 1.0000 |
| None of the above                                                           | 25 (26.6)          | 68 (46.6)          | 0.0019 |

Abbreviations: ARDS: Acute Respiratory Distress Syndrome; BMI: Body Mass Index; COPD: Chronic Obstructive Pulmonary Disease; ECMO: Extracorporeal Membrane Oxygenation; FiO<sub>2</sub>: Fraction of Inspired oxygen; HFOV: High Frequency Oscillatory Ventilation; IBW: Ideal Body Weight; ICU: Intensive Care Unit; IQR: interquartile range (1<sup>st</sup> quartile and 3<sup>rd</sup> quartile); P<sub>a</sub>CO<sub>2</sub> partial pressure of carbon dioxide; P<sub>a</sub>O<sub>2</sub>: arterial oxygen partial pressure; PEEP: Positive End-Expiratory Pressure; P<sub>PLAT</sub>: Plateau Pressure; SD: Standard Deviation; SOFA: Sequential Organ Failure Assessment; SpO<sub>2</sub>: peripheral oxygen saturation.

1. Comparison of male versus female patients.

2. Total is greater than 100%, since patients could have more than one risk factor.

3. Low tidal volume was defined as tidal volume  $\leq$  8 ml/IBW kg.

4. For peak pressure measurements patients receiving HFOV or ECMO were excluded.

5. P<sub>PLAT</sub> and driving pressure values are limited to patients in whom this value was reported, and in whom either an assist control mode was used or, where a mode permitting spontaneous ventilation was used, the set and total respiratory rates were equal. Patients receiving HFOV or ECMO were also excluded.

6. Standardized minute ventilation was calculated as minute ventilation  $\times$  P<sub>a</sub>CO<sub>2</sub> / 40.

7. For all SOFA scores, where data points were missing, this value was omitted and the denominator adjusted accordingly.

**Table e7.** Impact of sex and geo-economic region on outcomes of ARDS.

|                                                                                      | Geo-economic region                  |                                           |                               | p-value <sup>1</sup> |
|--------------------------------------------------------------------------------------|--------------------------------------|-------------------------------------------|-------------------------------|----------------------|
|                                                                                      | Europe<br>high income<br>(n = 1,263) | Rest of world<br>high income<br>(n = 649) | Middle<br>income<br>(n = 465) |                      |
|                                                                                      |                                      |                                           |                               |                      |
| Number of patients, n (%)                                                            |                                      |                                           |                               |                      |
| Female                                                                               | 465 (36.8)                           | 253 (39.0)                                | 187 (40.2)                    | 0.3720               |
| Male                                                                                 | 798 (63.2)                           | 396 (61.0)                                | 278 (59.8)                    |                      |
| Invasive ventilator-free days (days) <sup>2</sup> in ICU, median [IQR]               |                                      |                                           |                               |                      |
| All patients                                                                         | 8.0 [0.0 ; 22.0]                     | 18.0 [0.0 ; 24.0]*                        | 5.0 [0.0 ; 22.0]†             | <.0001               |
| Female                                                                               | 6.0 [0.0 ; 22.0]                     | 21.0 [0.0 ; 24.0]*                        | 7.0 [0.0 ; 22.0]†             | <.0001               |
| Male                                                                                 | 8.5 [0.0 ; 22.0]                     | 17.0 [0.0 ; 24.0]*                        | 1.0 [0.0 ; 20.0]†             | <.0001               |
| p-value (comparison between genders)                                                 | 0.7833                               | 0.1288                                    | 0.1787                        | -                    |
| Survivors at ICU discharge                                                           | 20.0 [11.5 ; 25.0]                   | 22.0 [17.0 ; 25.0]*                       | 20.0 [15.0 ; 24.0]†           | <.0001               |
| Female                                                                               | 21.0 [14.0 ; 24.0]                   | 23.0 [18.0 ; 25.0]*                       | 22.0 [17.0 ; 25.0]            | 0.0199               |
| Male                                                                                 | 19.0 [10.0 ; 25.0]                   | 22.0 [17.0 ; 26.0]*                       | 20.0 [15.0 ; 24.0]†           | <.0001               |
| p-value (comparison between genders)                                                 | 0.1193                               | 0.9682                                    | 0.0121                        | -                    |
| Duration of invasive mechanical ventilation (days) <sup>3</sup> in ICU, median [IQR] |                                      |                                           |                               |                      |
| All patients                                                                         | 8.0 [4.0 ; 16.0]                     | 7.0 [4.0 ; 13.0]*                         | 9.0 [4.0 ; 16.0]†             | <.0001               |
| Female                                                                               | 8.0 [4.0 ; 14.0]                     | 6.0 [4.0 ; 12.0]                          | 8.0 [4.0 ; 14.0]              | 0.3420               |
| Male                                                                                 | 9.0 [4.0 ; 18.0]                     | 7.0 [3.0 ; 13.0]*                         | 9.0 [5.0 ; 17.0]†             | <.0001               |
| p-value (comparison between genders)                                                 | 0.0170                               | 0.8949                                    | 0.0283                        | -                    |
| Survivors at ICU discharge                                                           | 9.0 [4.0 ; 17.5]                     | 7.0 [4.0 ; 12.0]*                         | 9.0 [5.0 ; 14.0]†             | <.0001               |
| Female                                                                               | 8.0 [5.0 ; 15.0]                     | 6.0 [4.0 ; 11.0]*                         | 7.0 [4.0 ; 12.0]              | 0.0205               |
| Male                                                                                 | 10.0 [4.0 ; 19.0]                    | 7.0 [3.0 ; 12.0]*                         | 9.0 [5.0 ; 14.0]†             | <.0001               |
| p-value (comparison between genders)                                                 | 0.1070                               | 0.9812                                    | 0.0125                        | -                    |
| Length of stay in ICU (days) <sup>4</sup> , median [IQR]                             |                                      |                                           |                               |                      |
| All patients                                                                         | 11.0 [5.0 ; 21.0]                    | 9.0 [5.0 ; 16.0]*                         | 11.0 [6.0 ; 19.0]†            | 0.0042               |
| Female                                                                               | 10.0 [5.0 ; 18.0]                    | 9.0 [0 ; 15.0]                            | 9.0 [5.0 ; 18.0]              | 0.6536               |
| Male                                                                                 | 11.0 [6.0 ; 23.0]                    | 10.0 [5.0 ; 17.0]*                        | 12.0 [7.0 ; 20.0]†            | 0.0027               |
| p-value (comparison between genders)                                                 | 0.0125                               | 0.5942                                    | 0.0174                        | -                    |
| Survivors at ICU discharge                                                           | 12.0 [7.0 ; 23.0]                    | 10.0 [6.0 ; 16.0]*                        | 12.0 [7.0 ; 20.0]†            | <.0001               |
| Female                                                                               | 12.0 [7.0 ; 21.0]                    | 9.0 [6.0 ; 15.0]*                         | 10.5 [6.0 ; 17.0]             | 0.0076               |
| Male                                                                                 | 12.0 [7.0 ; 24.0]                    | 11.0 [5.0 ; 18.0]*                        | 13.0 [8.0 ; 21.0]†            | 0.0007               |
| p-value (comparison between genders)                                                 | 0.2272                               | 0.4359                                    | 0.0155                        | -                    |
| Length of stay in hospital (days) <sup>5</sup> , median [IQR]                        |                                      |                                           |                               |                      |
| All patients                                                                         | 18.0 [8.0 ; 36.0]                    | 17.0 [8.0 ; 30.0]                         | 16.0 [8.0 ; 28.0]*            | 0.0372               |
| Female                                                                               | 16.0 [7.0 ; 30.0]                    | 17.0 [9.0 ; 31.0]                         | 14.0 [7.0 ; 25.0]             | 0.1018               |
| Male                                                                                 | 20.0 [9.0 ; 40.0]                    | 17.0 [8.0 ; 29.0]*                        | 17.0 [9.0 ; 30.0]             | 0.0134               |
| p-value (comparison between genders)                                                 | 0.0003                               | 0.6402                                    | 0.0360                        | -                    |
| Survivors at hospital discharge                                                      | 26.0 [14.0 ; 46.0]                   | 20.5 [12.0 ; 35.0]                        | 21.0 [12.0 ; 36.0]*           | <.0001               |
| Female                                                                               | 25.0 [14.5 ; 40.5]                   | 19.0 [12.0 ; 34.0]                        | 18.0 [11.0 ; 31.0]*           | 0.0037               |
| Male                                                                                 | 27.0 [14.0 ; 50.0]                   | 22.0 [12.0 ; 37.0]*                       | 22.0 [14.0 ; 40.0]            | 0.0025               |
| p-value (comparison between genders)                                                 | 0.0448                               | 0.4060                                    | 0.0212                        | -                    |
| Limitation of life sustaining measures in ICU, n (%)                                 |                                      |                                           |                               |                      |
| All patients                                                                         | 339 (26.8)                           | 157 (24.2)                                | 82 (17.6)*†                   | 0.0004               |

|                                      |            |            |             |        |
|--------------------------------------|------------|------------|-------------|--------|
| Female                               | 133 (28.6) | 57 (22.5)  | 35 (18.7)*  | 0.0183 |
| Male                                 | 206 (25.8) | 100 (25.3) | 47 (16.9)*† | 0.0088 |
| p-value (comparison between genders) | 0.2809     | 0.4295     | 0.6155      | -      |

Abbreviations: ICU: Intensive Care Unit.

1. Comparison among geo-economic area.

2. Invasive ventilator-free days were calculated as the number of days from weaning from invasive mechanical ventilation to the date of ICU discharge. Patients who died before weaning were considered to have a ventilator-free-day value of 0.

3. Duration of invasive mechanical ventilation was assessed during ICU stay and it was calculated as the number of days between the date of intubation and the date of extubation performed in ICU.

4. Length of stay in ICU was calculated as the number of days between the date of ICU admission and the date of ICU discharge (or 90 when discharge occurred after 90 days).

5. Length of stay in hospital was calculated as the number of days between the date of ICU admission and the date of hospital discharge (or 90 when discharge occurred after 90 days).

\* Comparison with "Europe high income group", p-value <0.05 (Bonferroni's correction).

† Comparison with "Rest of world high income", p-value <0.05 (Bonferroni's correction).

## Supplemental Figures

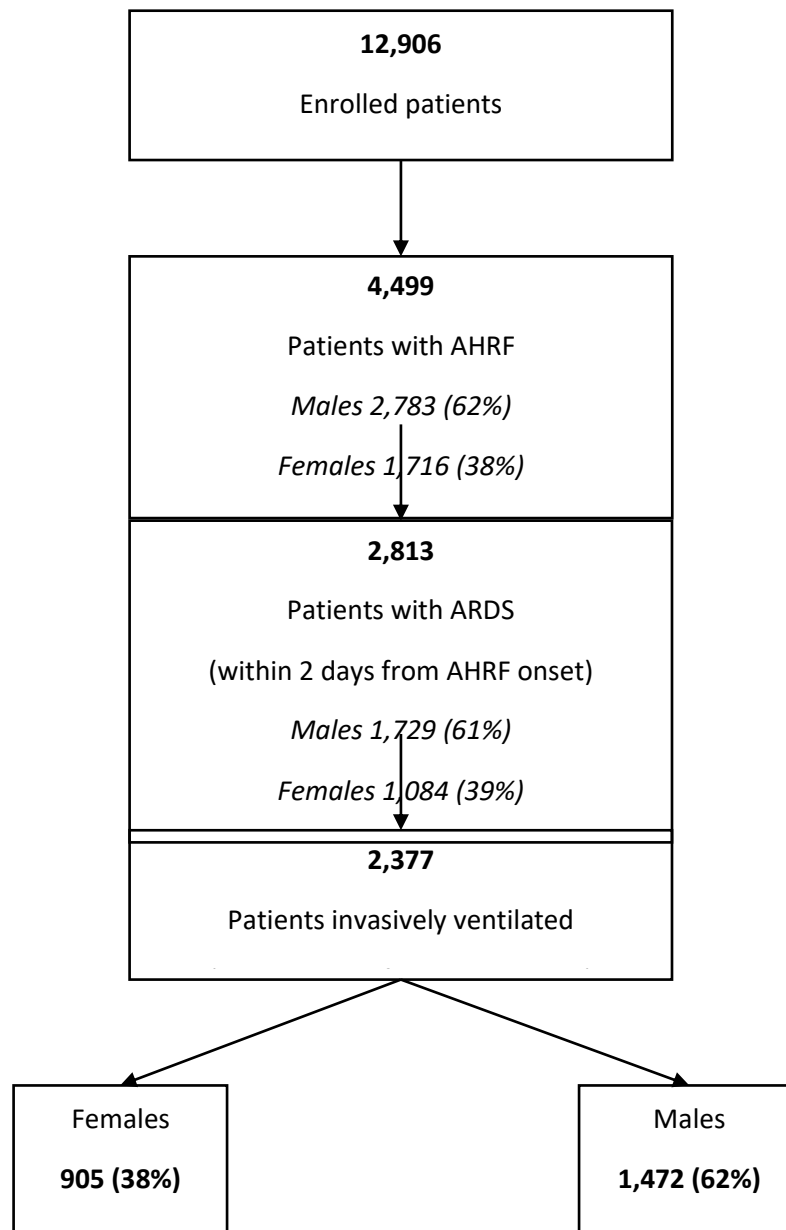

**Figure e1.** Flow-chart of study population.

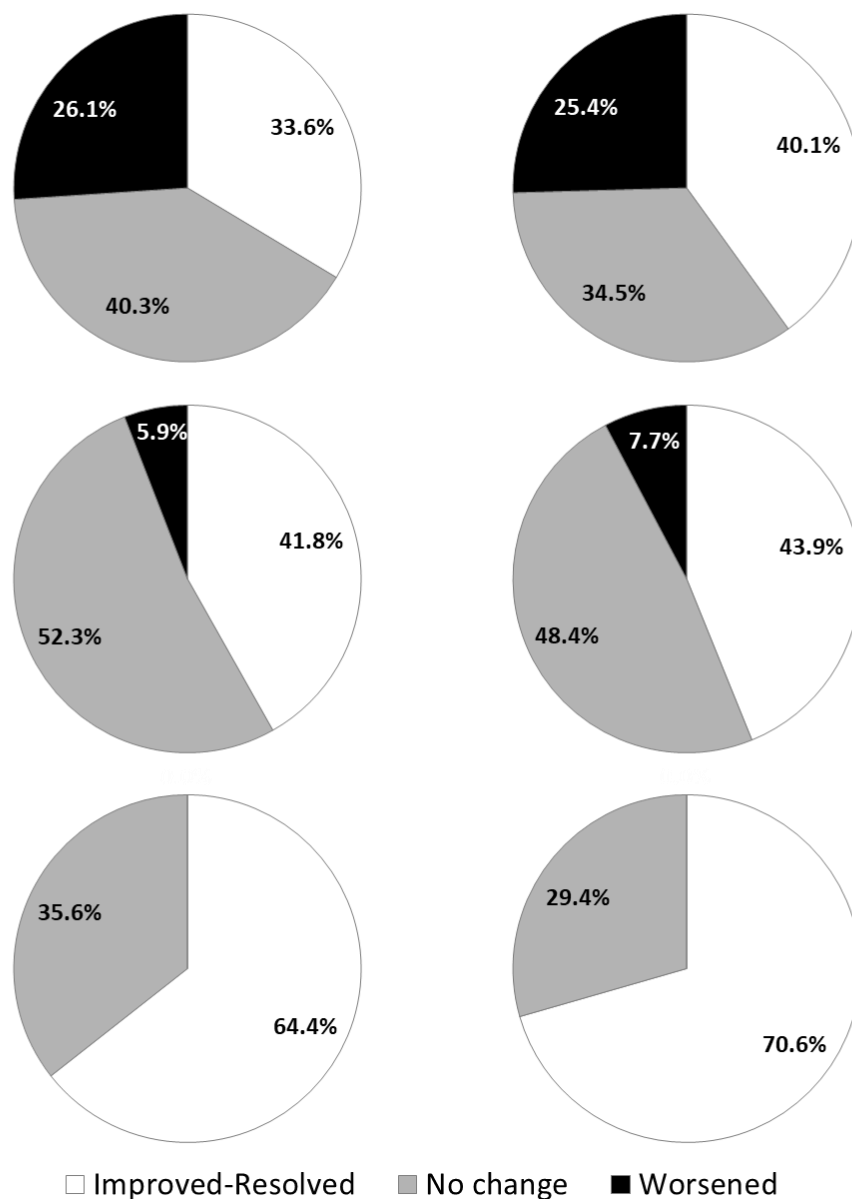

**Figure e2.** Progression of ARDS severity from first to second day in female and male patients with ARDS invasively ventilated.

*Note: Progression of ARDS severity at second day was evaluable for 2,114 patients (92% on 2,298 alive patients in ICU at day 2). No statistically significance differences were observed between males and females in the progression of ARDS severity, whether in mild ( $p$ -value=0.2191), in moderate ( $p$ -value=0.3575) and in severe ( $p$ -value=0.1613) patients at day 1.*

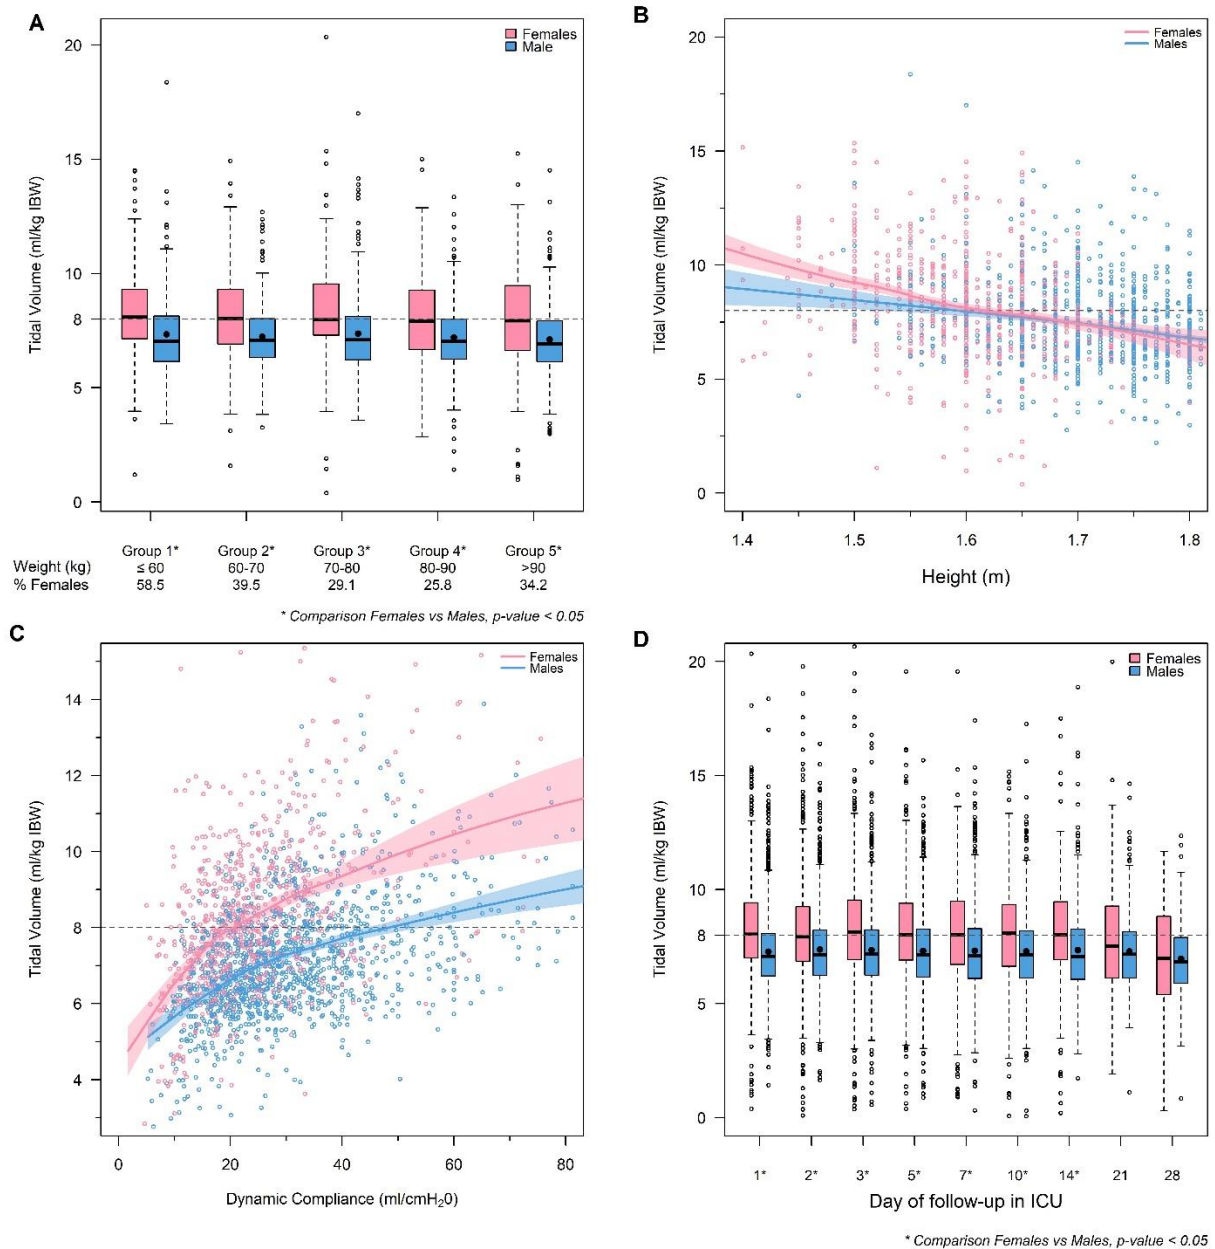

**Figure e3.** Use of tidal volumes in invasively ventilated female versus male patients with ARDS.

**Panel A.** Boxplot for tidal volume (ml/kg IBW) in male and female population stratified by quintiles of actual body weight in study population.

Note1: \* refers to  $p$ -value < 0.05 for the comparison between females and males.

Note2: Pearson correlation coefficient between tidal volume and weight in females and males is 0.0011 ( $p=0.9751$ ) and  $-0.0618$  ( $p=0.0213$ ), respectively.

**Panel B.** LOESS (locally estimated scatterplot smoothing) curve of relationship between tidal volume (ml/kg IBW) at first day of ARDS and height (meters) in males and females.

Note: LOESS curve uses a bandwidth 2/3 and 1 degree of polynomial regression.

**Panel C.** LOESS (locally estimated scatterplot smoothing) curve of relationship between tidal volume (ml/kg IBW) and dynamic compliance (ml/cmH<sub>2</sub>O) at first day of ARDS in males and females.

Note: LOESS curve uses a bandwidth 2/3 and 1 degree of polynomial regression.

**Panel D.** Changes in tidal volume (ml/kg IBW) during ICU stay in male and female patients with ARDS invasively ventilated.

Note: No trend during time was detected in both sexes. Trend was evaluated using linear model for repeated measures with unstructured covariance matrix [table e3].

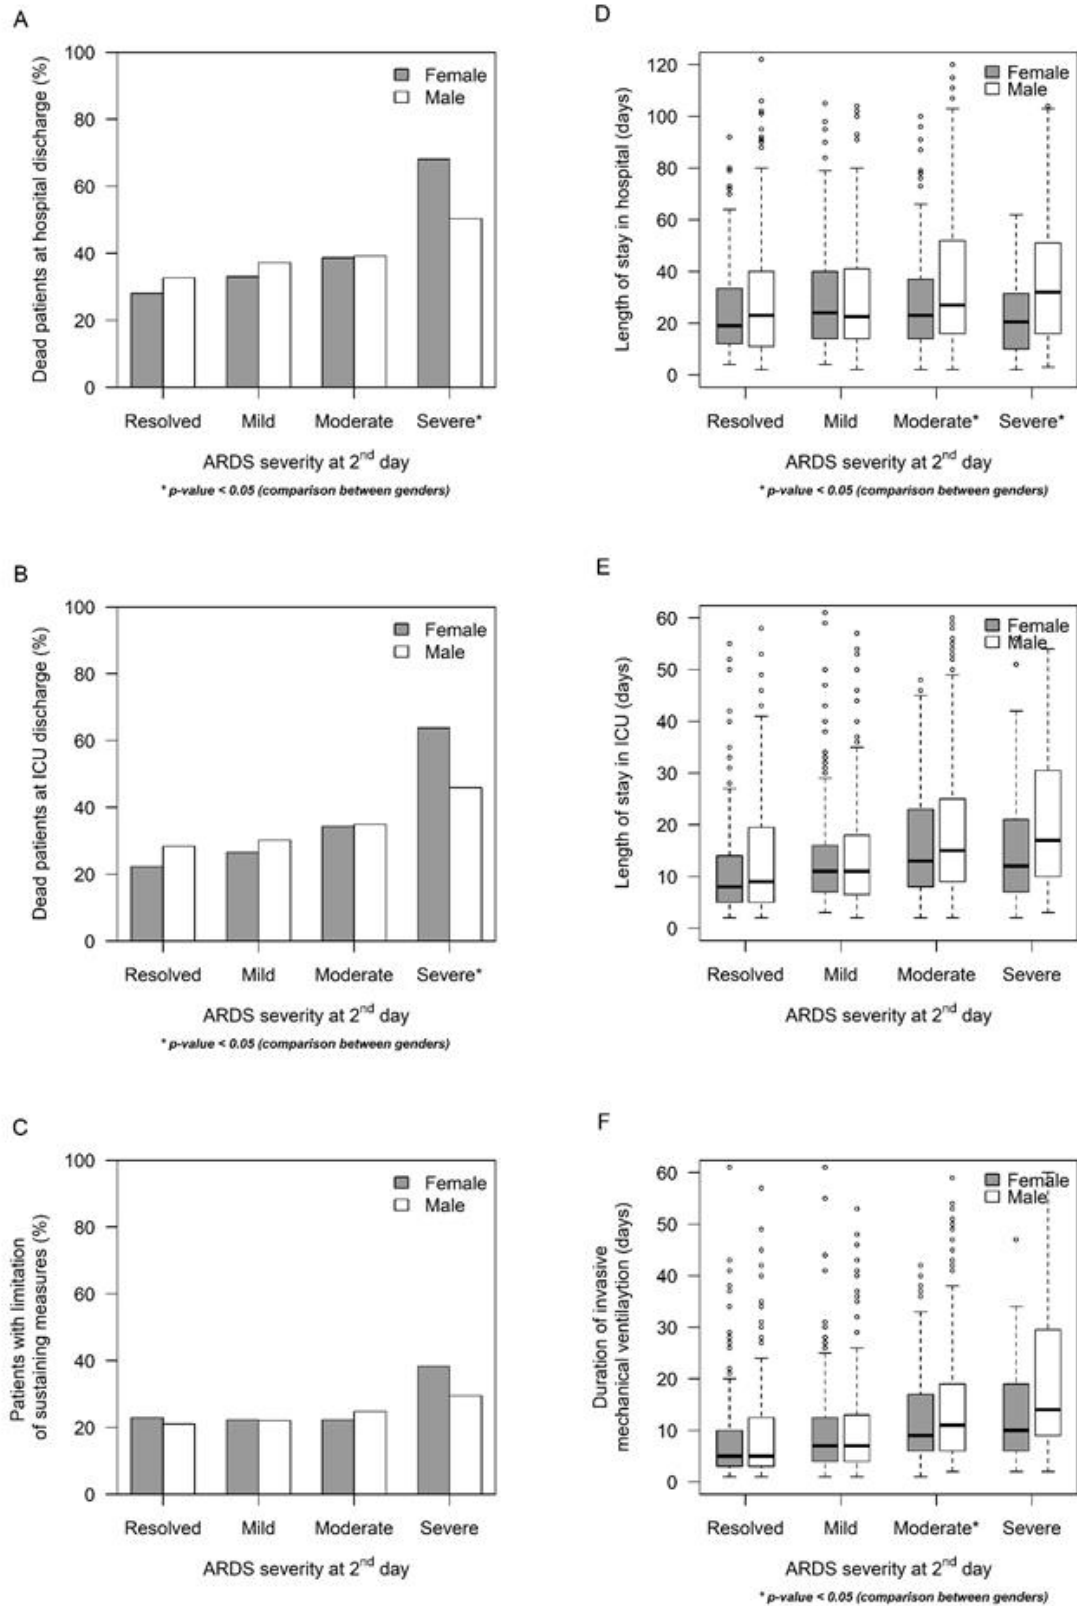

**Figure e4.** Outcomes in male and female patients stratified by ARDS severity at second day (resolved, mild, moderate and severe).



**Panel A.** Proportion of patients died at hospital discharge.

**Panel B.** Proportion of patients died at ICU discharge.

**Panel C.** Proportion of patients with limitation of sustaining measures in ICU.

**Panel D.** Boxplot for length of stay in hospital (days).

**Panel E.** Boxplot for length of stay in ICU (days).

**Panel F.** Boxplot for duration if invasive mechanical ventilation in ICU (days).

## References

1. Bellani G, Laffey JG, Pham T, Fan F, Brochard L, Esteban A, Gattinoni L, van Haren F, Larsson A, McAuley DF, Ranieri M, Rubenfeld GD, Thompson BT, Wrigge H, Slutsky AS, Pesenti A, LUNG SAFE Investigators, ESICM Trials Group. Epidemiology, patterns of care, and mortality for patients with acute respiratory distress syndrome in intensive care units in 50 countries. *JAMA* 2016; 315(8): 788-800.
2. Bellani G, Laffey JG, Pham T, Madotto F, Fan E, Brochard L, Esteban A, Gattinoni L, Bumbasirevic V, Piquilloud L, van Haren F, Larsson A, McAuley DF, Bauer PR, Arabi YM, Ranieri M, Antonelli M, Rubenfeld GD, Thompson BT, Wrigge H, Slutsky AS, Pesenti A, LUNG SAFE Investigators, ESICM Trials Group. Non-invasive Ventilation of Patients with Acute Respiratory Distress Syndrome: Insights from the LUNG SAFE Study. *Am J Respir Crit Care Med* 2017; 195(1): 67-77.
3. Laffey JG, Bellani G, Pham T, Fan E, Madotto F, Bajwa EK, Brochard L, Clarkson K, Esteban A, Gattinoni L, van Haren F, Heunks LM, Kurahashi K, Laake JH, Larsson A, McAuley DF, McNamee L, Nin N, Qiu H, Ranieri M, Rubenfeld GD, Thompson BT, Wrigge H, Slutsky AS, Pesenti A, LUNG SAFE Investigators, ESICM Trials Group. Potentially modifiable factors contributing to outcome from acute respiratory distress syndrome: the LUNG SAFE study. *Intensive Care Med* 2016; 42(12): 1865-1876.
4. Madotto F, Pham T, Bellani G, Bos LD, Simonis FD, Fan E, Artigas A, Brochard L, Schultz MJ, Laffey JG, LUNG SAFE Investigators, ESICM Trials Group. Resolved versus confirmed ARDS after 24 h: insights from the LUNG SAFE study. *Intensive Care Med* 2018; 44(5): 564-577.
5. von Elm E, Altman DG, Egger M, Pocock SJ, Gotsche PC, Vandenbroucke JP, Initiative S. Strengthening the Reporting of Observational Studies in Epidemiology (STROBE) statement: guidelines for reporting observational studies. *BMJ* 2007; 335(7624): 806-808.
6. Harrell FE. Regression modeling strategies. Springer-Verlag, New York, NY, 2001.
7. Villar J, Blanco J, Anon JM, Santos-Bouza A, Blanch L, Ambros A, Gandia F, Carriedo D, Mosteiro F, Basaldua S, Fernandez RL, Kacmarek RM. The ALIEN study: incidence and outcome of acute respiratory distress syndrome in the era of lung protective ventilation. *Intensive Care Med* 2011; 37(12): 1932-1941.

8. Brun-Buisson C, Minelli C, Bertolini G, Brazzi L, Pimentel J, Lewandowski K, Bion J, Romand JA, Villar J, Thorsteinsson A, Damas P, Armaganidis A, Lemaire F. Epidemiology and outcome of acute lung injury in European intensive care units. Results from the ALIVE study. *Intensive Care Med* 2004; 30(1): 51-61.
9. Rubenfeld GD, Caldwell E, Peabody E, Weaver J, Martin DP, Neff M, Stern EJ, Hudson LD. Incidence and outcomes of acute lung injury. *N Engl J Med* 2005; 353(16): 1685-1693.
10. Irish Critical Care Trials Group. Acute lung injury and the acute respiratory distress syndrome in Ireland: a prospective audit of epidemiology and management. *Crit Care* 2008; 12(1): R30.

## **Appendix 1: LUNG SAFE National coordinators, International Society/Network Endorsements, and Site Investigators**

### **LUNG SAFE national coordinators**

**Argentina:** Fernando Rios; **Australia/New Zealand:** Frank Van Haren; **Belgium:** Sottiaux T, Depuydt P; **Bolivia:** Fredy S Lora; **Brazil:** Luciano Cesar Azevedo; **Canada:** Eddy Fan; **Chile:** Guillermo Buggedo ; **China:** Haibo Qiu; **Colombia:** Marcos Gonzalez; **Costa Rica:** Juan Silesky; **Czech Republic:** Vladimir Cerny; **Denmark:** Jonas Nielsen; **Ecuador:** Manuel Jibaja; **France:** Tàì Pham; **Germany:** Hermann Wrigge; **Greece:** Dimitrios Matamis; **Guatemala:** Jorge Luis Ranero; **India:** Pravin Amin; **Iran:** S.M. Hashemian; **Ireland:** Kevin Clarkson; **Italy:** Giacomo Bellani; **Japan:** Kiyoyasu Kurahashi; **Mexico:** Asisclo Villagomez; **Morocco:** Amine Ali Zeggwagh; **Netherlands:** Leo M Heunks; **Norway:** Jon Henrik Laake ; **Philippines:** Jose Emmanuel Palo ; **Portugal:** Antero do Vale Fernandes; **Romania:** Dorel Sandesc; **Saudi Arabia:** Yaasen Arabi; **Serbia:** Vesna Bumbasierevic; **Spain:** Nicolas Nin, Jose A Lorente; **Sweden:** Anders Larsson; **Switzerland:** Lise Piquilloud; **Tunisia:** Fekri Abroug; **United Kingdom:** Daniel F McAuley, Lia McNamee; **Uruguay:** Javier Hurtado; **USA:** Ed Bajwa; **Venezuela:** Gabriel Démpaire;

### **National societies/Networks endorsing the study:**

ANZICS Clinical Trials Group, Réseau Européen de Recherche en Ventilation Artificielle (ReVA Network); Irish Critical Care Trials Group; Société de Réanimation de Langue Française (SRLF); Société Française d'Anesthésie et de Réanimation (SFAR); Società Italiana Anestesia, Analgesia, Rianimazione e Terapia Intensiva (SIAARTI); The Japanese Society of Intensive Care Medicine (JSICM); Nonprofit Organization Japanese Society of Education for Physicians and Trainees in Intensive Care (JSEPTIC); UK Intensive Care Society.

**STUDY COORDINATION:** Guy M Francois (European Society of Intensive Care Medicine, Brussels, Belgium)

**Site Investigators by Country:**

**ALBANIA:** Uhc Mother Theresa (Tirana): Hektor Sula, Lordian Nunci; University Hospital Shefqet Ndroqi (Tirana): Alma Cani;

**ARGENTINA:** Clinica De Especialidades (Villa Maria): Alan Zazu ; Hospital Dr Julio C. Perrando (Resistencia): Christian Deller, Carolina S Insaurrealde; Sanatorio Las Lomas (San Isidro, Buenos Aires): Risso V Alejandro; Sanatorio De La Trinidad San Isidro (San Isidro): Julio Daldin, Mauricio Vinzio; Hospital Español De Mendoza (Godoy Cruz - Mendoza): Ruben O Fernandez; Hospital Del Centenario (Rosario): Luis P Cardonnet, Lisandro R Bettini; San Antonio (Guauguay (Entre Rios)): Mariano Carboni Bisso, Emilio M Osman; Cemic (Buenos Aires): Mariano G Setten, Pablo Lovazzano; Hospital Universitario Austral (Pilar): Javier Alvarez, Veronica Villar; Hospital Por + Salud (Pami) Dr. Cesar Milstein (Buenos Aires): Norberto C Pozo, Nicolas Grubissich; Sanatorio Anchorena (Buenos Aires): Gustavo A Plotnikow, Daniela N Vasquez; Sanatorio De La Trinidad Mitre (Buenos Aires): Santiago Ilutovich, Norberto Tiribelli; Hospital Luis Lagomaggiore (Mendoza): Ariel Chena, Carlos A Pellegrini; H.I.G.A San Martín (La Plata): María G Saenz, Elisa Estenssoro; Hospital Misericordia (Cordoba): Matias Brizuela, Hernan Gianinetto; Sanatorio Juncal (Temperley): Pablo E Gomez, Valeria I Cerrato; Hospital D. F. Santojanni (Buenos Aires): Marco G Bezzi, Silvina A Borello; Hospital Alejandro Posadas (Buenos Aires): Flavia A Loiacono, Adriana M Fernandez;

**AUSTRALIA:** St. Vincents Hospital, Sydney (Darlinghurst): Serena Knowles, Claire Reynolds; St George Public Hospital (Kogarah): Deborah M Inskip, Jennene J Miller; Westmead Hospital

(Westmead): Jing Kong, Christina Whitehead; Flinders Medical Centre (Bedford Park, South Australia): Shailesh Bihari; John Hunter Hospital (Newcastle): Aylin Seven, Amanda Krstevski; Canberra Hospital (Garran): Helen J Rodgers, Rebecca T Millar; Calvary Mater Newcastle (Waratah): Toni E McKenna, Irene M Bailey; Cabrini Hospital (Melbourne): Gabrielle C Hanlon; Liverpool Hospital (Liverpool): Anders Aneman, Joan M Lynch; Coffs Harbour Health Campus (Coffs Harbour): Raman Azad, John Neal; Sir Charles Gairdner Hospital (Nedlands): Paul W Woods, Brigit L Roberts; Concord Hospital (Concord): Mark R Kol, Helen S Wong;

**AUSTRIA:** General Hospital Of Vienna/Medical University Of Vienna (Vienna): Katharina C Riss, Thomas Staudinger;

**BELGIUM:** Cliniques universitaires St Luc, UCL (Brussels): Xavier Wittebole, Caroline Berghe; CHU Dinant-Godinne (Yvoir): Pierre A Bulpa, Alain M Dive; AZ Sint Augustinus Veurne (Veurne): Rik Verstraete, Herve Lebbinck; Ghent University Hospital (Ghent): Pieter Depuydt, Joris Vermassen;; University Hospitals Leuven (Leuven): Philippe, Meersseman, Helga Ceunen;

**BRAZIL:** Hospital Renascentista (Pouso Alegre): Jonas I Rosa, Daniel O Beraldo; Vitoria Apart Hospital (Serra): Claudio Piras, Adenilton M Rampinelli; Hospital Das Clinicas (São Paulo): Antonio P Nassar Jr; Hospital Geral Do Grajaú (São Paulo): Sergio Mataloun, Marcelo Moock; Evangelical Hospital (Cachoeiro De Itapemirim / Espírito Santo): Marlus M Thompson, Claudio H Gonçalves-.,; Hospital Moinhos De Vento (Porto Alegre): Ana Carolina P Antônio, Aline Ascoli; Hospital Alvorada Taguatinga (Taguatinga): Rodrigo S Biondi, Danielle C Fontenele; Complexo Hospitalar Mngabeira Tarcisio Burity (Joao Pessoa): Danielle Nobrega, Vanessa M Sales;

**BRUNEI DARUSSALAM:** Raja Isteri Pengiran Anak Saleha (Ripas) Hospital (Bandar Seri Begawan): Dr Suresh .Shindhe, Dr Dk Maizatul Aiman B Pg Hj Ismail;

**CANADA:** Medical-Surgical ICU of St Michael's Hospital (Toronto): John Laffey, Francois Beloncle; St. Josephs Health Centre (Toronto): Kyle G Davies, Rob Cirone; Sunnybrook Health Sciences Center (Toronto): Venika Manoharan, Mehvish Ismail; Toronto Western Hospital (Toronto): Ewan C Goligher, Mandeep Jassal; Medical Surgical ICU of the Toronto General Hospital (Toronto): Erin Nishikawa, Areej Javeed; Cardiovascular ICU of St Michael's Hospital (Toronto): Gerard Curley, Nuttapol Rittayamai ; Cardiovascular ICU of the Toronto General Hospital (Toronto): Matteo Parotto, Niall D Ferguson; Mount Sinai Hospital (Toronto): Sangeeta Mehta, Jenny Knoll ; Trauma-Neuro ICU of St Michael's Hospital (Toronto): Antoine Pronovost, Sergio Canestrini

**CHILE:** Hospital Clínico Pontificia Universidad Católica De Chile (Santiago): Alejandro R Bruhn, Patricio H Garcia; Hospital Militar De Santiago (Santiago): Felipe A Aliaga, Pamela A Farías; Clinica Davila (Santiago): Jacob S Yumha; Hospital Guillermo Grant Benavente (Concepcion): Claudia A Ortiz, Javier E Salas; Clinica Las Lilas (Santiago): Alejandro A Saez, Luis D Vega; Hospital Naval Almirante Nef (Viña Del Mar): Eduardo F Labarca, Felipe T Martinez; Hospital Luis Tisné Brousse (Penanolen): Nicolás G Carreño, Pilar Lora;

**CHINA:** The Second Affiliated Hospital Of Harbin Medical University (Harbin): Haitao Liu; Nanjing Zhong-Da Hospital, Southeast University (Nanjing): Haibo Qiu, Ling Liu; The First Affiliated Hospital Of Anhui Medical University (Hefei): Rui / Tang, Xiaoming Luo; Peking University People's Hospital (Beijing): Youzhong An, Huiying Zhao; Fourth Affiliated Hospital Of Harbin Medical University (Harbin): Yan - Gao, Zhe - Zhai; Nanjing Jiangbei Peoples Hospital Affiliated To Medical School Of Southeast University (Nanjing): Zheng L Ye, Wei Wang; The First Affiliated Hospital Of Dalian Medical Unvercity (Dalian): Wenwen Li, Qingdong Li; Subei

Peoples Hospital Of Jiangsu Province (Yangzhou): Ruiqiang Zheng ; Jinling Hospital (Nanjing): Wenkui Yu, Juanhong Shen; Urumqi General Hospital (Urumqi): Xinyu Li; Intensive Care Unit, First Affiliated Hospital Of Wana Medical College, Yijishan Hospital, (Wuhu): Tao Yu, Weihua Lu; Sichuan Provincial Peoples Hospital (Chengdu): Ya Q Wu, Xiao B Huang; Hainan Province Peoples Hospital (Haikou): Zhenyang He; Peoples Hospital Of Jiangxi Province (Nanchang): Yuanhua Lu; Qilu Hospital Of Shandong University (Jinan): Hui Han, Fan Zhang; Zhejiang Provincial Peoples Hospital (Hangzhou): Renhua Sun ; The First Affiliated Hospital Of Bengbu Medical College (Bengbu, Anhui): Hua X Wang, Shu H Qin; Nanjing Municipal Government Hospital (Nanjing): Bao H Zhu, Jun Zhao; The First Hospital Of Lanzhou University (Lanzhou): Jian / Liu, Bin / Li; The First Affiliated Hospital Of Chongqing University Of Medical Science (Chongqing): Jing L Liu, Fa C Zhou; Xuzhou Central Hospital, Jiangsu Province, China (Xuzhou): Qiong J Li, Xing Y Zhang; The First Peoples Hospital Of Foshan (Foshan): Zhou Li-Xin, Qiang Xin-Hua; The First Affiliated Hospital Of Guangxi Medical University (Nanning): Liangyan Jiang; Renji Hospital ,Shanghai Jiao Tong University School Of Medicine (Shanghai): Yuan N Gao, Xian Y Zhao; First Hospital Of Shanxi Medical University (Taiyuan): Yuan Y Li, Xiao L Li; Shandong Provincial Hospital (Jinan): Chunting Wang, Qingchun Yao ; Fujian Provincial Hospital (Fuzhou): Rongguo Yu, Kai Chen; Henan Provincial People's Hospital (Zhengzhou): Huanzhang Shao, Bingyu Qin ; The Second Affiliated Hospital Of Kunming Medical University (Kunming City): Qing Q Huang, Wei H Zhu; Xiangya Hospital, Central South University (Changsha): Ai Y Hang, Ma X Hua; The First Affiliated Hospital Of Guangzhou Medical University (Guangzhou): Yimin Li, Yonghao Xu; Peoples Hospital of Hebei Province (Shijiazhuang): Yu D Di, Long L Ling; Guangdong General Hospital (Guangzhou): Tie H Qin, Shou H Wang; Beijing Tongren Hospital (Beijing): Junping Qin; Jiangsu Province Hospital (Nanjing): Yi Han, Suming Zhou; COLOMBIA: Fundación Valle Del Lili (Cali): Monica P Vargas;



**COSTA RICA:** Hospital San Juan De Dios (): Juan I Silesky Jimenez, Manuel A González Rojas;  
Hospital San Juan De Dios (San José): Jaime E Solis-Quesada, Christian M Ramirez-Alfaro;

**CZECH REPUBLIC:** University Hospital Of Ostrava (Ostrava): Jan Máca, Peter Sklienka;

**DENMARK:** Aarhus Universitetshospital (Aarhus N): Jakob Gjedsted, Aage Christiansen;  
Rigshospitalet: Jonas Nielsen;

**ECUADOR:** Hospital Militar (Quito): Boris G Villamagua, Miguel Llano;

**FRANCE:** Clinique du Millenaire (Montpellier): Philippe Burtin, Gautier Buzancais; Centre Hospitalier (Roanne): Pascal Beuret, Nicolas Pelletier; CHU d'Angers (Angers): Satar Mortaza, Alain Mercat; Hôpital Marc Jacquet (Melun): Jonathan Chelly, Sébastien Jochmans; CHU Caen (Caen): Nicolas Terzi, Cédric Daubin; Henri Mondor Hospital (Créteil): Guillaume Carteaux, Nicolas de Prost; Cochin Hospital (Paris): Jean-Daniel Chiche, Fabrice Daviaud ; Hôpital Tenon (Paris): Tai Pham, Muriel Fartoukh; CH Mulhouse-Emile Muller (Mulhouse): Guillaume Barberet, Jerome Biehler; Archet 1 University Hospital (Nice): Jean Dellamonica, Denis Doyen; Hopital Sainte Musse (Toulon): Jean-Michel Arnal, Anais Briquet; Hopital Nord - Réanimation des Détresses Respiratoires et Infections Sévères (Marseille): Sami Hraiech, Laurent Papazian; HEGP (Paris):Arnaud Follin; Louis Mourier Hospital (Colombes): Damien Roux, Jonathan Messika; Centre Hospitalier de Dax (Dax ): Evangelos Kalaitzis ; Réanimation Médicale, GH Pitié-Salpêtrière (Paris) : Laurence Dangers, Alain Combes; Ap-Hp Ambroise Paré (Boulogne-Billancourt): Siu-Ming Au; University Hospital Rouen (Rouen): Gaetan Béduneau, Dorothée Carpentier; CHU Amiens (Amiens - Salouel): Elie H Zogheib, Herve Dupont; Centre Hospitalier Intercommunal Robert Ballanger (Aulnay Sous Bois): Sylvie Ricome, Francesco L Santoli; Centre Hospitalier René Dubos (Pontoise): Sebastien L Besset; CHI Portes de l'Oise (Beaumont Sur Oise): Philippe Michel, Bruno Gelée; Archet 2 University Hospital (Nice): Pierre-Eric Danin,

Bernard Goubaux; Centre Hospitalier Pierre Oudot (Bourgoin Jallieu): Philippe J Crova, Nga T Phan; CH Dunkerque (Dunkerque): Frantz Berkelmans ; Centre Hospitalier de Belfort Montbéliard (Belfort): Julio C Badie, Romain Taponnier; Centre Hospitalier Emile Muller (Mulhouse): Josette Gally, Samy Khebbab; Hôpital de Hautepierre-Hôpitaux Universitaires de Strasbourg (Strasbourg): Jean-Etienne Herbrecht, Francis Schneider; Centre Hospitalier de Dieppe (Dieppe): Pierre-Louis M Declercq, Jean-Philippe Rigaud; Bicetre (Le Kremlin-Bicetre): Jacques Duranteau, Anatole Harrois; CHU Gabriel Montpied (Clermont-Ferrand): Russell Chabanne, Julien Marin; CHU Estaing (Clermont-Ferrand): Charlene Bigot, Sandrine Thibault; CHI Eure-Seine Evreux (Evreux): Mohammed Ghazi, Messabi Boukhazna; Centre Hospitalier d Châlons en Champagne (Châlons en Champagne): Salem Ould Zein; CH Beauvais (Beauvais): Jack R Richecoeur, Daniele M Combaux; Centre Hospitalier Le Mans (Le Mans): Fabien Grelon, Charlene Le Moal; Hôpital Fleyriat (Bourg en Bresse): Elise P Sauvadet, Adrien Robine; Hôpital Saint Louis (Paris): Virginie Lemiale, Danielle Reuter; Service de Pneumologie Pitié-Salpêtrière (Paris): Martin Dres, Alexandre Demoule; Centre Hospitalier Gonesse (Gonesse): Dany Goldgran-Toledano; Hôpital Croix Rousse (Lyon): Loredana Baboi, Claude Guérin;

**GERMANY:** St. Nikolaus-Stiftshospital (Andernach): Ralph Lohner; Fachkrankenhaus Coswig Gmbh (Coswig): Jens Kraßler, Susanne Schäfer; University Hospital Frankfurt (Frankfurt am Main): Kai D Zacharowski, Patrick Meybohm; Department of Anaesthesia & Intensive Care Medicine, University Hospital of Leipzig (Leipzig): Andreas W Reske, Philipp Simon; Asklepios Klinik Langen (Langen): Hans-Bernd F Hopf, Michael Schuetz; Städtisches Krankenhaus Heinsberg (Heinsberg): Thomas Baltus;

**GREECE:** Hippokrateion General Hospital Of Athens (Athens): Metaxia N Papanikolaou, Theonymfi G Papavasilopoulou; Gh Ahepa (Thessaloniki): Giannis A Zacharas, Vasilis Ourailogloy; Hippokration General Hospital of Thessaloniki (Thessaloniki): Eleni K Mouloudi,

Eleni V Massa; Hospital General of Kavala (Kavala): Eva O Nagy, Electra E Stamou; Papageorgiou General Hospital (Thessaloniki): Ellada V Kiourtzieva, Marina A Oikonomou;

**GUATEMALA:** Hospital General De Enfermedades, Instituto Guatemalteco De Seguridad Social (Ciudad De Guatemala): Luis E Avila; Centro Médico Militar (Guatemala): Cesar A Cortez, Johanna E Citalán;

**INDIA:** Deenanath Mangeshkar Hospital And Research Center (Pune): Sameer A Jog, Safal D Sable; Care Institute Of Medical Sciences (CIMS) Hospital (Ahmedabad): Bhagyesh Shah ; Sanjay Gandhi Postgraduate Institute Of Medical Sciences (SGPGIMS) (Lucknow): Mohan Gurjar, Arvind K Baronia; Rajasthan Hospital (Ahmedabad): Mohammedfaruk Memon ; National Institute Of Mental Health And Neuro Sciences (NIMHANS) (Bangalore): Radhakrishnan Muthuchellappan, Venkatapura J Ramesh; Anaesthesiology Unit of the Kasturba Medical College & Dept of Respiratory Therapy, SHOAS, Manipal University (Manipal): Anitha Shenoy, Ramesh Unnikrishnan; Sanjeevan Hospital (Pune): Subhal B Dixit, Rachana V Rhayakar; Apollo Hospitals (Chennai): Nagarajan Ramakrishnan , Vallish K Bhardwaj; Medicine Unit of the Kasturba Medical College & Dept of Respiratory Therapy, SHOAS, Manipal University (Manipal): Heera L Mahto, Sudha V Sagar; G Kuppuswamy Naidu Memorial Hospital (Coimbatore): Vijayanand Palaniswamy, Deeban Ganesan;

**IRAN:** NRITLD/Masih Daneshvari (Tehran): Seyed Mohammadreza Hashemian, Hamidreza Jamaati ; Milad Hospital (Tehran): Farshad Heidari

**IRELAND:** St Vincent's University Hospital (Dublin): Edel A Meaney, Alistair Nichol; Mercy University Hospital (Cork): Karl M Knapman, Donall O'Croinin ; Cork University Hospital (Cork): Eimhin S Dunne, Dorothy M Breen; Galway University Hospital (Galway): Kevin P Clarkson, Rola F Jaafar; Beaumont Hospital (Dublin): Rory Dwyer, Fahd Amir; Mater

Misericordiae University Hospital (Dublin): Olaitan O Ajetunmobi, Aogan C O'Muircheartaigh;  
Tallaght Hospital (Dublin): Colin S Black, Nuala Treanor; Saint James's Hospital (Dublin):  
Daniel V Collins, Wahid Altaf;

**ITALY:** Santa Maria delle Croci Hospital (Ravenna): Gianluca Zani, Maurizio Fusari;  
Arcispedale Sant'Anna Ferrara. (Ferrara): Savino Spadaro, Carlo A Volta; Ospedale Profili  
(Fabriano) (An): Romano Graziani, Barbara Brunettini; Umberto I Nocera Inferiore (Nocera  
Inferiore Salerno): Salvatore Palmese; Azienda Ospedaliera San Paolo – Polo Universitario-  
Università degli Studi di Milano (Milan): Paolo Formenti, Michele Umbrello; Sant'Anna (San  
Fermo Della Battaglia (Co)): Andrea Lombardo; Spedali Civili Brescia (Brescia): Elisabetta  
Pecci, Marco Botteri; Fondazione Irccs Ca Granda, Ospedale Maggiore Policlinico (Milan):  
Monica Savioli, Alessandro Protti; University Campus Bio-Medico of Rome (Rome): Alessia  
Mattei, Lorenzo Schiavoni; Azienda Ospedaliera "Mellino Mellini" (Chiari (Bs)): Andrea  
Tinnirello, Manuel Todeschini; Policlinico P. Giaccone, University of Palermo (Palermo):  
Antonino Giarratano, Andrea Cortegiani; Niguarda Cà Granda Hospital (Milan): Sara Sher, Anna  
Rossi; A.Gemelli University Hospital (Rome): Massimo M Antonelli, Luca M Montini; Ospedale  
"Sandro Pertini" (Rome): Paolo Casalena, Sergio Scafetti; ISMeTT IRCCS UPMC (Palermo):  
Giovanna Panarello, Giovanna Occhipinti; Ospedale San Gerardo (Monza): Nicolò Patroniti,  
Matteo Pozzi; Santa Maria Della Scaletta (Imola): Roberto R Biscione, Michela M Poli;  
Humanitas Research Hospital (Rozzano): Ferdinando Raimondi, Daniela Albiero; Ospedale Desio  
- Ao Desio-Vimercate (Desio): Giulia Crapelli, Eduardo Beck; Pinetagrande Private Hospital  
(Castelvoturno): Vincenzo Pota, Vincenzo Schiavone; Irccs San Martino Ist (Genova):  
Alexandre Molin, Fabio Tarantino; Ospedale San Raffaele (Milano): Giacomo Monti, Elena  
Fрати; Ospedali Riuniti Di Foggia (Foggia): Lucia Mirabella, Gilda Cinnella; Azienda Ospedaliera  
Luigi Sacco - Polo Universitario (Milano): Tommaso Fossali, Riccardo Colombo; A.O.U. Città

della Salute e della Scienza di Torino (Turin): Pierpaolo Terragni Ilaria Pattarino; Università degli Studi di Pavia-Fondazione IRCCS Policlinico San Matteo (Pavia): Francesco Mojoli, Antonio Braschi; Ao Ospedale Civile Legnano (Legnano): Erika E Borotto; Arnas Ospedale Civico Di Cristina Benfratelli (Palermo): Andrea N Cracchiolo, Daniela M Palma; Azienda Ospedaliera Della Provincia Di Lecco - Ospedale "A. Manzoni" (Lecco): Francesco Raponi, Giuseppe Foti; A.O. Provincia Di Lecco - Ospedale Alessandro Manzoni (Lecco): Ettore R Vascotto, Andrea Coppadoro; Cliniche Universitarie Sassari (Sassari): Luca Brazzi, Leda Floris; IRCCS Policlinico San Matteo (Pavia): Giorgio A Iotti, Aaron Venti;

**JAPAN:** Yokohama City University Hospital (Yokohama): Osamu Yamaguchi, Shunsuke Takagi; Toyooka Hospital (Toyooka City, Hyogo Prefecture): Hiroki N Maeyama; Chiba University Hospital (Chiba City): Eizo Watanabe, Yoshihiro Yamaji; Okayama University Hospital (Okayama): Kazuyoshi Shimizu, Kyoko Shiozaki; Japanese Foundation for Cancer Research, Cancer Institute Hospital, Department Of Emergency Medicine And Critical Care (Tokyo): Satoru Futami; Ibaraki Prefectural Central Hospital (Kasama): Sekine Ryosuke; Tohoku University Hospital (Sendai-Shi): Koji Saito, Yoshinobu Kameyama; Tokyo Medical University Hachioji Medical Center (Hachioji, Tokyo): Keiko Ueno; Tokushima University Hospital (Tokushima): Masayo . Izawa, Nao Okuda; Maebashi Red Cross Hospital (Gunma Maebashi): Hiroyuki Suzuki, Tomofumi Harasawa; Urasoe General Hospital (Urasoe): Michitaka Nasu, Tadaaki Takada; Ohta General Hospital Foundation Ohta Nishinouchi Hospital (Fukushima): Fumihito Ito; Jichi Medical University Hospital (Shimotsuke): Shin - Nunomiya, Kansuke - Koyama; Mito Kyodo General Hospital, Tsukuba University Hospital Mito Medical Center (Mito): Toshikazu Abe; Sendai City Hospital (Sendai): Kohkichi Andoh, Kohei Kusumoto; Ja Hiroshima General Hospital (Hatsukaichi City, Hiroshima): Akira Hirata, Akihiro Takaba; Yokohama Rosai Hospital (Yokohama): Hiroyasu Kimura; Nagasaki University Hospital

(Nagasaki): Shuhei Matsumoto, Ushio Higashijima; Niigata University Medical & Dental Hospital (Niigata): Hiroyuki Honda, Nobumasa Aoki; Mie University Hospital (Tsu, Mie): Hiroshi Imai; Yamaguchi University Hospital (Ube, Yamaguchi): Yasuaki Ogino, Ichiko Mizuguchi; Saiseikai Kumamoto Hospital (Kumamoto City): Kazuya Ichikado; Shinshu University School Of Medecine (Matsumoto City): Kenichi Nitta, Katsunori Mochizuki; Kuki General Hospital (Kuki): Tomoaki Hashida; Kyoto Medical Center (Kyoto): Hiroyuki Tanaka ; Fujita Health University (Toyoake): Tomoyuki Nakamura, Daisuke Niimi; Rakwakai Marutamachi Hospital (Kyoto): Takeshi Ueda; Osaka University Hospital (Suita City, Osaka Prefecture): Yozo Kashiwa, Akinori Uchiyama;

**LATVIA:** Paul Stradins Clinical University Hospital (Riga): Olegs Sabelnikovs , Peteris Oss ;

**LEBANON:** Kortbawi Hospital (Jounieh): Youssef Haddad ;

**MALAYSIA:** Hospital Kapit (Kapit): Kong Y Liew;

**MEXICO:** Instituto Nacional De Cancerología, México (Mexico City): Silvio A Ñamendys-Silva, Yves D Jarquin-Badiola; Hospital De Especialidades "Antonio Fraga Mouret" Centro Medico Nacional La Raza IMSS (Mexico City): Luis A Sanchez-Hurtado, Saira S Gomez-Flores; Hospital Regional 1° De Octubre (Mexico City): Maria C Marin, Asisclo J Villagomez; Hospital General Dr Manuel Gea Gonzalez (Mexico City): Jordana S Lemus, Jonathan M Fierro; Hospital General De Zona No. 1 Instituto Mexicano Del Seguro Social Tepic Nayarit (Tepic): Mavy Ramirez Cervantes, Francisco Javier Flores Mejia; Centro Medico Dalinde (Mexico D.F.): Dulce Dector, Dulce M Dector; Opd Hospital Civil De Guadalajara Hospital Juan I Menchaca (Guadalajara): Daniel R Gonzalez, Claudia R Estrella; Hospital Regional De Ciudad Madero Pemex (Ciudad Madero): Jorge R Sanchez-Medina, Alvaro Ramirez-Gutierrez; Centro Médico ABC (Mexico

D.F.): Fernando G George, Janet S Aguirre; Hospital Juarez De Mexico (Mexico City): Juan A Buensuseso, Manuel Poblano;

**MOROCCO:** Mohammed V University, University Teaching Ibn Sina Hospital (Rabat): Tarek Dendane, Amine Ali Zeggwagh; Hopital Militaire D’Instruction Mohammed V (Rabat): Hicham Balkhi; Errazi (Marrakech): Mina Elkhayari, Nacer Samkaoui; University Teaching Hospital Ibn Rushd (Casablanca): Hanane Ezzouine, Abdellatif Benslama; Hôpital des Spécialités de Rabat (HSR) (Rabat): Mourad Amor, Wajdi Maazouzi;

**NETHERLANDS:** Tjongerschans (Heerenveen): Nedim Cimic, Oliver Beck; Cwz (Nijmegen): Monique M Bruns, Jeroen A Schouten; Rijnstate Hospital (Arnhem): Myra - Rinia, Monique Raaijmakers; Radboud Umc (Nijmegen): Leo M Heunks, Hellen M Van Wezel; Maastricht University Medical Centre (Maastricht): Serge J Heines, Ulrich Strauch; Catharinaziekenhuis (Eindhoven): Marc P Buise; Academic Medical Center (Amsterdam): Fabienne D Simonis, Marcus J Schultz;

**NEW ZEALAND:** Tauranga Hospital (Tauranga): Jennifer C Goodson, Troy S Browne; Wellington Hospital (Wellington): Leanlove Navarra, Anna Hunt; Dunedin Hospital (Dunedin): Robyn A Hutchison, Mathew B Bailey; Auckland City Hospital (Auckland): Lynette Newby, Colin Mcarthur; Whangarei Base Hospital (Whangarei): Michael Kalkoff, Alex Mcleod; North Shore Hospital (Auckland): Jonathan Casement, Danielle J Hacking;

**NORWAY:** Ålesund Hospital (Ålesund): Finn H Andersen, Merete S Dolva; Oslo University Hospital - Rikshospitalet Medical Centre (Oslo): Jon H Laake, Andreas Barratt-Due; Stavanger University Hospital (Stavanger): Kim Andre L Noremark, Eldar Søreide; Haukeland University Hospital (Bergen): Brit Å Sjøbø, Anne B Guttormsen;

**PERU:** Hospital Nacional Edgardo Rebagliati Martins (Lima): Hector H Leon Yoshido; Clínica Ricardo Palma (Lima): Ronald Zumaran Aguilar, Fredy A Montes Oscanoa;

**PHILIPPINES:** The Medical City (Pasig): Alain U Alisasis, Joanne B Robles; Chong Hua Hospital (Cebu): Rossini Abbie B Pasanting-Lim, Beatriz C Tan;

**POLAND:** Warsaw University Hospital (Warsaw): Pawel Andruszkiewicz, Karina Jakubowska;

**PORTUGAL:** Centro Hospitalar Da Cova Da Beira (Covilhã): Cristina M Coxo; Hospital Santa Maria, Chln (Lisboa): António M Alvarez, Bruno S Oliveira; Centro Hospitalar Trás-Os-Montes E Alto Douro - Hospital De S.Pedro -Vila Real (Vila Real): Gustavo M Montanha, Nelson C Barros; Hospital Beatriz Ângelo (Loures): Carlos S Pereira, António M Messias; Hospital De Santa Maria (Lisboa): Jorge M Monteiro; Centro Hospitalar Médio Tejo - Hospital De Abrantes (Abrantes): Ana M Araujo, Nuno T Catorze; Instituto Português De Oncologia De Lisboa (Lisboa): Susan M Marum, Maria J Bouw; Hospital Garcia De Orta (Almada): Rui M Gomes, Vania A Brito; Centro Hospitalar Do Algarve (Faro): Silvia Castro, Joana M Estilita; Hpp Hospital De Cascais (Alcabideche): Filipa M Barros; Hospital Prof. Doutor Fernando Fonseca Epe (Amadora): Isabel M Serra, Aurelia M Martinho;

**ROMANIA:** Fundeni Clinical Institute (Bucharest): Dana R Tomescu, Alexandra Marcu; Emergency Clinical County Hospital Timisoara (Timisoara): Ovidiu H Bedreag, Marius Papurica; Elias University Emergency Hospital (Bucharest): Dan E Corneci, Silviu Ioan Negoita;

**RUSSIAN FEDERATION:** University Hospital (Kemerovo): Evgeny Grigoriev ;Krasnoyarsk Regional Hospital, Krasnoyarsk State Medical University (Krasnoyarsk): Alexey I Gritsan, Andrey A Gazenkampf;

**SAUDI ARABIA:** GICU of PSMHC (Riyadh): *Ghaleb Almekhlafi, Mohamad M Albarrak*; SICU of PSMHC (Riyadh): Ghanem M Mustafa;; King Faisal Hospital And Research Center (Riyadh):



Khalid A Maghrabi, Nawal Salahuddin; King Fahad Hospital (Baha): Tharwat M Aisa; King Abdulaziz Medical City (Riyadh): Ahmed S Al Jabbary, Edgardo Tabhan; King Abdulaziz Medical City (Riyadh): Yaseen M Arabi; King Abdulaziz Medical City (Riyadh): Yaseen M Arabi, Olivia A Trinidad; King Abdulaziz Medical City (Riyadh): Hasan M Al Dorzi, Edgardo E Tabhan;

**SOUTH AFRICA:** Charlotte Maxeke Johannesburg Academic Hospital (Johannesburg): Stefan Bolon, Oliver Smith;

**SPAIN:** Hospital Sant Pau (Barcelona): Jordi Mancebo, Hernan Aguirre-Bermeo; Hospital Universitari Bellvitge (L Hospitalet De Llobregat (Barcelona)): Juan C Lopez-Delgado, Francisco Esteve; Hospital Son Llatzer (Palma De Mallorca): Gemma Rialp, Catalina Forteza; Sabadell Hospital, CIBER Enfermedades Respiratorias (Sabadell): Candelaria De Haro, Antonio Artigas; Hospital Universitario Central De Asturias (Oviedo): Guillermo M Albaiceta, Sara De Cima-Iglesias; Complejo Hospitalario Universitario A Coruña (A Coruña): Leticia Seoane-Quiroga, Alexandra Ceniceros-Barros; Hospital Universitario Miguel Servet (Zaragoza): Antonio L Ruiz-Aguilar, Luis M Claraco-Vega; Morales Meseguer University Hospital (Murcia): Juan Alfonso Soler, Maria del Carmen Lorente; Hospital Universitario del Henares (Coslada): Cecilia Hermosa, Federico Gordo; Complejo Asistencial De Palencia. Hospital Rio Carrión (Palencia): Miryam - Prieto-González, Juan B López-Messa; Fundación Jiménez Díaz (Madrid): Manuel P Perez, Cesar P Perez; Hospital Clínico Universitario Lozano Blesa (Zaragoza): Raquel Montoiro Allue; Hospital Verge de la Cinta (Tortosa): Ferran Roche-Campo, Marcos Ibañez-Santacruz; Hospital Universitario 12 De Octubre (Madrid): Susana - Temprano; Hospital Universitario Príncipe De Asturias (Alcalá De Henares, Madrid): Maria C Pintado, Raul De Pablo; Hospital Universitari Germans Trias I Pujol (Badalona): Pilar Ricart Aroa Gómez; Hospital Universitario Arnau De Vilanova De Lleida (Lleida): Silvia Rodriguez Ruiz, Silvia Iglesias Moles; Cst Terrassa (Barcelona): M<sup>a</sup> Teresa Jurado, Alfons Arizmendi; Hospital Universitari Mútua Terrassa

(Terrassa): Enrique A Piacentini; Hospital Universitario De Móstoles (Mostoles): Nieves Franco, Teresa Honrubia; Complejo Asistencial De Salamanca (Salamanca): Meisy Perez Cheng, Elena Perez Losada; Hospital General Universitario De Ciudad Real (Ciudad Real): Javier - Blanco, Luis J Yuste; Torrecardenas (Almeria): Cecilia Carbayo-Gorriz, Francisca G Cazorla-Barranquero; Hospital Universitario Donostia (San Sebastian): Javier G Alonso, Rosa S Alda; Hospital Universitario De Torrejón (Madrid): Ángela Algaba, Gonzalo Navarro; Hospital Universitario De La Princesa (Madrid): Enrique Cereijo, Esther Diaz-Rodriguez; Hospital Universitario Lucus Augusti (Lugo): Diego Pastor Marcos, Laura Alvarez Montero; Hospital Universitario Santa Lucia (Cartagena): Luis Herrera Para, Roberto Jimenez Sanchez; Hospital Universitario Severo Ochoa, Leganes (Madrid): Miguel Angel Blasco Navalpotro, Ricardo Diaz Abad; University Hospital Of Ntra. Sra. De Candelaria (Santa Cruz De Tenerife): Raquel Montiel Gonz á lez, D á cil Parrilla Toribio; Hospital Universitario Marques De Valdecilla (Santander): Alejandro G Castro, Maria Jose D Artiga; Hospital Infanta Cristina (Parla, Madrid): Oscar Penuelas ; Hospital General De Catalunya (Sant Cugat Del Valles): Tomas P Roser, Moreno F Olga; San Pedro De Alcántara (Cáceres): Elena Gallego Curto, Rocío Manzano Sánchez; Sant Joan De Reus (Reus): Vallverdu P Imma, Garcia M Elisabet; Hospital Joan XXIII (Tarragona): Laura Claverias, Monica Magret; Hospital Universitario De Getafe (Madrid): Ana M Pellicer, Lucia L Rodriguez; Hospital Universitario Río Hortega (Valladolid): Jesús Sánchez-Ballesteros, Ángela González-Salamanca; Hospital Arquitecto Marcide (Ferrol,La Coruña): Antonio G Jimenez, Francisco P Huerta; Hospital General Universitario Gregorio Marañón (Madrid): Juan Carlos J Sotillo Diaz, Esther Bermejo Lopez;Hospital General De Segovia (Segovia): David D Llinares Moya, Alec A Tallet Alfonso; Hospital General Universitario Reina Sofia (Murcia): Palazon Sanchez Eugenio Luis, Palazon Sanchez Cesar; Complejo Hospitalario Universitario De Albacete (Albacete): Sánchez I Rafael, Corcoles G Virgilio; Hospital Infanta Elena (Valdemoro): Noelia N Recio;

**SWEDEN:** Sahlgrenska University Hospital (Gothenburg): Richard O Adamsson, Christian C Rylander; Karolinska University Hospital (Stockholm): Bernhard Holzgraefe, Lars M Broman; Akademiska Sjukhuset Uppsala (Uppsala): Joanna Wessbergh, Linnea Persson; Vrinnevisjukhuset (Norrköping): Fredrik Schiöler, Hans Kedelv; Linköping University Hospital (Linköping): Anna Oscarsson Tibblin, Henrik Appelberg; Skellefteå Lasarett (Skellefteå): Lars Hedlund, Johan Helleberg; Karolinska University Hospital Solna (Stockholm): Karin E Eriksson, Rita Glietsch; Umeå University Hospital (Umeå): Niklas Larsson, Ingela Nygren; Danderyd Hospital (Stockholm): Silvia L Nunes, Anna-Karin Morin; Lund University Hospital (Lund): Thomas Kander, Anne Adolfsson;

**SWITZERLAND:** Chuv (Centre Hospitalier Universitaire Vaudois) (Lausanne): Lise Piquilloud; Hôpital neuchâtelois - La Chaux-De-Fonds (La Chaux-De-Fonds): Hervé O. Zender, Corinne Leemann-Refondini;

**TUNISIA:** Hopital Taher Sfar Mahdia (Mahdia): Souheil Elatrous; University Hospital Farhat Hached Sousse (Sousse): Slaheddine Bouchoucha, Imed Chouchene; CHU F.Bourguiba (Monastir): Islem Ouanes; Mongi Slim University Hospital, La Marsa (La Marsa): Asma Ben Souissi, Salma Kamoun;

**TURKEY:** Cerrahpasa Medical Faculty Emergency Intensive Care Unit (Istanbul): Oktay Demirkiran; Cerrahpasa Medical Faculty Sadi Sun Intensive Care Unit (Istanbul) : Mustafa Aker, Emre Erbabacan; Uludag University Medical Faculty (Bursa): Ilkay Ceylan, Nermin Kelebek Girgin; Ankara University Faculty of Medicine, Reanimation 3rd level ICU (Ankara): Menekse Ozcelik, Necmettin Ünal; Ankara University Faculty of Medicine, 2nd level ICU-postoperative ICU (Ankara): Basak Ceyda Meco; Istanbul Kartal Egitim Ve Arastirma Hastanesi (Istanbul): Onat O Akyol, Suleyman S Derman;

**UNITED KINGDOM:** Papworth Hospital (Cambridge): Barry Kennedy, Ken Parhar; Royal Glamorgan Hospital (Llantrisant): Latha Srinivasa; Royal Victoria Hospital-Belfast (Belfast): Lia McNamee, Danny McAuley; Jack Steinberg ICU of the King's College (London): Phil Hopkins, Clare Mellis; Frank Stansil ICU of the King's College Hospital (London): Vivek Kakar; ;Liver ICU of the King's College (London): Dan Hadfield; Christine Brown ICU of the King's College (London): Andre Vercueil; West Suffolk Hospital (Bury St Edmunds): Kaushik Bhowmick, Sally K Humphreys; Craigavon Area Hospital (Portadown): Andrew Ferguson, Raymond Mckee; Barts Health NHS Trust, Whipps Cross Hospital (Leytonstone): Ashok S Raj, Danielle A Fawkes; Kettering General Hospital, Foundation NHS Trust (Northamptonshire): Philip Watt, Linda Twohey; Barnet General Hospital (Barnet): Rajeev R JhaMatthew Thomas, Alex Morton, Varsha Kadaba; Rotherham General Hospital (Rotherham): Mark J Smith, Anil P Hormis; City Hospital, (Birmingham): Santhana G Kannan, Miriam Namih; Poole Hospital NHS Foundation Trust (Poole): Henrik Reschreiter, Julie Camsooksai; Weston General Hospital (Weston-Super-Mare): Alek Kumar, Szabolcs Rugonfalvi; Antrim Area Hospital (Antrim): Christopher Nutt, Orla Oneill; Aintree University Hospital (Liverpool): Colette Seasman, Ged Dempsey; Northern General Hospital (Sheffield): Christopher J Scott, Helen E Ellis; John Radcliffe Hospital (Oxford): Stuart Mckechnie, Paula J Hutton; St Georges Hospital (London): Nora N Di Tomasso, Michela N Vitale; Hillingdon Hospital (Uxbridge): Ruth O Griffin, Michael N Dean; The Royal Bournemouth & Christchurch NHS Foundation Trust (Bournemouth, Dorset): Julius H Cranshaw, Emma L Willett; Guys And St Thomas NHS Foundation Trust (London): Nicholas Ioannou, Gsst Severe Respiratory Failure Service ; Whittington Hospital (London): Sarah Gillis; Wexham Park Hospital (Slough): Peter Csabi; Western General Hospital (Edinburgh): Rosaleen Macfadyen, Heidi Dawson; Royal Preston Hospital (Preston): Pieter D Preez, Alexandra J Williams; Brighton And Sussex University Hospitals NHS Trust (Brighton): Owen Boyd, Laura Ortiz-Ruiz De Gordo; East And North Herts NHS Trust (Stevenage): Jon Bramall, Sophie Symmonds; Barnsley

Hospital (Barnsley): Simon K Chau, Tim Wenham; Prince Charles Hospital (Merthyr Tydfil): Tamas Szakmany, Piroska Toth-Tarsoly; University Hospital Of South Manchester NHS Foundation Trust (Manchester): Katie H Mccalman, Peter Alexander; Harrogate District Hospital (Harrogate): Lorraine Stephenson, Thomas Collyer; East And North Herts NHS Trust (Welwyn Garden City): Rhiannon Chapman, Raphael Cooper; Western Infirmary (Glasgow): Russell M Allan, Malcolm Sim; Dumfries And Galloway Royal Infirmary (Dumfries): David W Wrathall, Donald A Irvine; Charing Cross Hospital (London): Kim S Zantua, John C Adams; Worcestershire Royal Hospital (Worcester): Andrew J Burtenshaw, Gareth P Sellors; Royal Liverpool University Hospital (Liverpool): Ingeborg D Welters, Karen E Williams; Royal Alexandra Hospital (Glasgow): Robert J Hessell, Matthew G Oldroyd; Morriston Hospital (Swansea): Ceri E Battle, Suresh Pillai; Frimley Park Hospital (Frimley): Istvan - Kajtor, Mageswaran - Sivashanmugavel; Altnagelvin Hospital (Derry): Sinead C O'Kane, Adrian Donnelly; Buckinghamshire Healthcare NHS Trust (High Wycombe, Buckinghamshire): Aniko D Frigyik, Jon P Careless; Milton Keynes Hospital (Milton Keynes): Martin M May, Richard Stewart; Ulster Hospital (Belfast): T John Trinder, Samantha J Hagan; University Hospital of Wales (Cardiff): Jade M Cole; Freeman Hospital (Newcastle Upon Tyne): Caroline C MacFie, Anna T Dowling;

**URUGUAY:** Hospital Español (Montevideo): Javier Hurtado, Nicolás Nin; Cudam (Montevideo): Javier Hurtado; Sanatorio Mautone (Maldonado): Edgardo Nuñez ; Sanatorio Americano (Montevideo): Gustavo Pittini, Ruben Rodriguez; Hospital De Clínicas (Montevideo): María C Imperio, Cristina Santos; Circulo Católico Obreros Uruguay- Sanatorio JPII (Montevideo): Ana G. França, Alejandro EBEID; CASMU (Montevideo): Alberto Deicas, Carolina Serra

**USA:** Saint Louis University Hospital (St.Louis): Aditya Uppalapati, Ghassan Kamel; Beth Israel Deaconess Medical Center (Boston): Valerie M Banner-Goodspeed, Jeremy R Beitler; Memorial Medical Center (Springfield): Satyanarayana Reddy Mukkera, Shreedhar Kulkarni;

Massachusetts General Hospital (Boston): Jarone Lee, Tomaz Mesar; University Of Cincinnati Medical Center (Cincinnati): John O Shinn III, Dina - Gomaa; Massachusetts General Hospital (Boston): Christopher Tainter, Jarone Lee; Massachusetts General Hospital (Boston): Tomaz Mesar, Jarone Lee; R Adams Cowley Shock Trauma Center (Baltimore): Dale J Yeatts, Jessica Warren; Intermountain Medical Center (Murray, Utah): Michael J Lanspa, Russel R Miller; Intermountain Medical Center (Murray, Utah): Colin K Grissom, Samuel M Brown; Mayo Clinic (Rochester): Philippe R Bauer; North Shore Medical Center (Salem): Ryan J Gosselin, Barrett T Kitch; Albany Medical Center (Albany): Jason E Cohen, Scott H Beegle; John H Stoger Hospital Of Cook County (Chicago, IL): Renaud M Gueret, Aiman Tulaimat; Albany Medical Center (Albany): Shazia Choudry ; University of Alabama at Birmingham (UAB) (Birmingham, AL): William Stigler, Hitesh Batra ; Duke University Hospital (Durham): Nidhi G Huff; Iowa Methodist Medical Center (Des Moines, Iowa): Keith D Lamb, Trevor W Oetting; Surgical & Neurosciences Intensive Care Unit of the University Of Iowa Hospitals And Clinics (Iowa City, Iowa): Nicholas M Mohr, Claine Judy; Medical Center of Louisiana at New Orleans (New Orleans, Louisiana): Shigeki Saito, Fayez M Kheir; Tulane University (New Orleans): Fayez Kheir; Critical Care Unit of the University Of Iowa Hospitals And Clinics (Iowa City, Iowa): Adam B Schlichting, Angela Delsing; University Of California, San Diego Medical Center (San Diego, Ca): Daniel R Crouch, Mary Elmasri; UC San Diego Thornton Hospital (La Jolla): Daniel R Crouch, Dina Ismail; University Hospital (Cincinnati): Kyle R Dreyer, Thomas C Blakeman; University Hospital (Cincinnati): Kyle R Dreyer, Dina Gomaa; Tower 3B Medical ICU of Brigham and Women's Hospital (Boston): Rebecca M Baron, Carolina Quintana Grijalba; Tower 8C Burn/Trauma ICU of Brigham and Women's Hospital (Boston): Peter C Hou; Tower 8D Surgical ICU of Brigham and Women's Hospital (Boston): Raghu Seethala; Tower 9C Neurosurgical ICU of Brigham and Women's Hospital (Boston): Imo Aisiku; Tower 9D Neurological ICU of Brigham and Women's Hospital (Boston): Galen Henderson; Tower 11C Thoracic ICU of Brigham and Women's

Hospital (Boston): Gyorgy Frendl; Shapiro 6W Cardiac Surgery ICU of Brigham and Women's

Hospital (Boston): Sen-Kuang Hou; Shapiro 9E Coronary Care Unit of Brigham and Women's

Hospital (Boston): Robert L Owens, Ashley Schomer;

**SERBIA:** Clinical Center of Serbia (Belgrade): Vesna Bumbasirevic, Bojan Jovanovic; ; Military

Medical Academy (Belgrade): Maja Surbatovic, Milic Veljovic;
