# Supplementary material
Source: HighWire-hosted journal article supplement (https://erj.ersjournals.com/content/54/4/1900609)
Supplement: inline-supplementary-material-2 [file inline-supplementary-material-2.pdf]

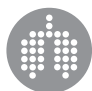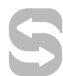

SHAREABLE PDF

# Demographics, management and outcome of females and males with acute respiratory distress syndrome in the LUNG SAFE prospective cohort study

Bairbre A. McNicholas<sup>1,2,7,10</sup>, Fabiana Madotto<sup>3,10</sup>, Tàì Pham<sup>4,5,6</sup>, Emanuele Rezoagli<sup>1,7</sup>, Claire H. Masterson<sup>1</sup>, Shahd Horie<sup>1</sup>, Giacomo Bellani<sup>8,9</sup>, Laurent Brochard<sup>4,5,6</sup> and John G. Laffey<sup>1,7</sup> on behalf of the LUNG SAFE Investigators and the ESICM Trials Group

**Affiliations:** <sup>1</sup>Regenerative Medicine Institute (REMEDI), CÚRAM Centre for Research in Medical Devices, School of Medicine, National University of Ireland Galway, Galway, Ireland. <sup>2</sup>Nephrology Services, Galway University Hospitals, SAOLTA University Healthcare Group, Galway, Ireland. <sup>3</sup>Research Centre on Public Health, School of Medicine and Surgery, University of Milano-Bicocca, Monza, Italy. <sup>4</sup>Keenan Research Centre for Biomedical Science, St Michael's Hospital, Toronto, ON, Canada. <sup>5</sup>Dept of Critical Care Medicine, St Michael's Hospital, Toronto, ON, Canada. <sup>6</sup>Interdepartmental Division of Critical Care Medicine, University of Toronto, Toronto, ON, Canada. <sup>7</sup>Dept of Anaesthesia and Intensive Care Medicine, Galway University Hospitals, SAOLTA University Healthcare Group, Galway, Ireland. <sup>8</sup>School of Medicine and Surgery, University of Milan-Bicocca, Monza, Italy. <sup>9</sup>Dept of Emergency and Intensive Care, San Gerardo Hospital, Monza, Italy. <sup>10</sup>These authors are joint first authors.

**Correspondence:** John G. Laffey, Anaesthesia and Intensive Care Medicine, School of Medicine, National University of Ireland Galway, University Road, Galway, H91 TK33, Ireland. E-mail: john.laffey@nuigalway.ie

@ERSpublications

**Shorter females with ARDS were less likely to receive lower tidal volume ventilation than shorter males, while mortality rates were higher in females with confirmed severe ARDS. Better ventilatory management may improve outcomes in females with ARDS.** <http://bit.ly/2JIsUBz>

**Cite this article as:** McNicholas BA, Madotto F, Pham T, *et al.* Demographics, management and outcome of females and males with acute respiratory distress syndrome in the LUNG SAFE prospective cohort study. *Eur Respir J* 2019; 54: 1900609 [<https://doi.org/10.1183/13993003.00609-2019>].

This single-page version can be shared freely online.

## ABSTRACT

**Rationale:** We wished to determine the influence of sex on the management and outcomes in acute respiratory distress syndrome (ARDS) patients in the Large Observational Study to Understand the Global Impact of Severe Acute Respiratory Failure (LUNG SAFE).

**Methods:** We assessed the effect of sex on mortality, intensive care unit and hospital length of stay, and duration of invasive mechanical ventilation (IMV) in patients with ARDS who underwent IMV, adjusting for plausible clinical and geographic confounders.

**Findings:** Of 2377 patients with ARDS, 905 (38%) were female and 1472 (62%) were male. There were no sex differences in clinician recognition of ARDS or critical illness severity profile. Females received higher tidal volumes ( $8.2 \pm 2.1$  versus  $7.2 \pm 1.6$  mL·kg<sup>-1</sup>;  $p < 0.0001$ ) and higher plateau and driving pressures compared with males. Lower tidal volume ventilation was received by 50% of females compared with 74% of males ( $p < 0.0001$ ). In shorter patients (height  $\leq 1.69$  m), females were significantly less likely to receive lower tidal volumes. Surviving females had a shorter duration of IMV and reduced length of stay compared with males. Overall hospital mortality was similar in females (40.2%) versus males (40.2%). However, female sex was associated with higher mortality in patients with severe confirmed ARDS (OR for

sex (male *versus* female) 0.35, 95% CI 0.14–0.83).

**Conclusions:** Shorter females with ARDS are less likely to receive lower tidal volume ventilation, while females with severe confirmed ARDS have a higher mortality risk. These data highlight the need for better ventilatory management in females to improve their outcomes from ARDS.
